# Supplementary material for: Benchmarking taxonomic assignments based on 16S rRNA gene profiling of the microbiota from commonly sampled environments
Source: PubMed Central journal article supplement (PMC5967554; doi:10.1093/gigascience/giy054), 2018-05-11
Supplement: giy054_giga-d-18-00043_r1.pdf [file giy054_giga-d-18-00043_r1.pdf]

## Benchmarking taxonomic assignments based on 16S rRNA gene profiling of the microbiota from commonly sampled environments

--Manuscript Draft--

|                                                      |                                                                                                                                                                                                                                                                                                                                                                                                                                                                                                                                                                                                                                                                                                                                                                                                                                                                                                                                                                                                                                                                                                                                                                                                                                                                                                                                                                                                                                                                                                                                                                                                                                                                                                                         |                      |
|------------------------------------------------------|-------------------------------------------------------------------------------------------------------------------------------------------------------------------------------------------------------------------------------------------------------------------------------------------------------------------------------------------------------------------------------------------------------------------------------------------------------------------------------------------------------------------------------------------------------------------------------------------------------------------------------------------------------------------------------------------------------------------------------------------------------------------------------------------------------------------------------------------------------------------------------------------------------------------------------------------------------------------------------------------------------------------------------------------------------------------------------------------------------------------------------------------------------------------------------------------------------------------------------------------------------------------------------------------------------------------------------------------------------------------------------------------------------------------------------------------------------------------------------------------------------------------------------------------------------------------------------------------------------------------------------------------------------------------------------------------------------------------------|----------------------|
| <b>Manuscript Number:</b>                            | GIGA-D-18-00043R1                                                                                                                                                                                                                                                                                                                                                                                                                                                                                                                                                                                                                                                                                                                                                                                                                                                                                                                                                                                                                                                                                                                                                                                                                                                                                                                                                                                                                                                                                                                                                                                                                                                                                                       |                      |
| <b>Full Title:</b>                                   | Benchmarking taxonomic assignments based on 16S rRNA gene profiling of the microbiota from commonly sampled environments                                                                                                                                                                                                                                                                                                                                                                                                                                                                                                                                                                                                                                                                                                                                                                                                                                                                                                                                                                                                                                                                                                                                                                                                                                                                                                                                                                                                                                                                                                                                                                                                |                      |
| <b>Article Type:</b>                                 | Technical Note                                                                                                                                                                                                                                                                                                                                                                                                                                                                                                                                                                                                                                                                                                                                                                                                                                                                                                                                                                                                                                                                                                                                                                                                                                                                                                                                                                                                                                                                                                                                                                                                                                                                                                          |                      |
| <b>Funding Information:</b>                          | European Bioinformatics Institute                                                                                                                                                                                                                                                                                                                                                                                                                                                                                                                                                                                                                                                                                                                                                                                                                                                                                                                                                                                                                                                                                                                                                                                                                                                                                                                                                                                                                                                                                                                                                                                                                                                                                       | Dr Alexandre Almeida |
|                                                      | H2020 Research Infrastructures (676559)                                                                                                                                                                                                                                                                                                                                                                                                                                                                                                                                                                                                                                                                                                                                                                                                                                                                                                                                                                                                                                                                                                                                                                                                                                                                                                                                                                                                                                                                                                                                                                                                                                                                                 | Not applicable       |
| <b>Abstract:</b>                                     | <p>Background: Taxonomic profiling of ribosomal RNA (rRNA) sequences has been the accepted norm for inferring the composition of complex microbial ecosystems. QIIME and mothur have been the most widely used taxonomic analysis tools for this purpose, with MAPseq and QIIME 2 being two recently released alternatives. However, no independent and direct comparison between these four main tools has been performed. Here, we compared the default classifiers of MAPseq, mothur, QIIME, and QIIME 2 using synthetic simulated datasets comprised of some of the most abundant genera found in the human gut, ocean and soil environments. We evaluate their accuracy when paired with both different reference databases and variable sub-regions of the 16S rRNA gene.</p> <p>Findings: We show that QIIME 2 provided the best recall and F-scores at genus and family levels, together with the lowest distance estimates between the observed and simulated samples. However, MAPseq showed the highest precision, with miscall rates consistently below 2%. Notably, QIIME 2 was the most computationally expensive tool, with CPU time and memory usage almost two and 30 times higher than MAPseq, respectively. Using the SILVA database generally yielded a higher recall than using Greengenes, while assignment results of different 16S rRNA variable sub-regions varied up to 40% between samples analysed with the same pipeline.</p> <p>Conclusions: Our results support the use of either QIIME 2 or MAPseq for optimal 16S rRNA gene profiling, and we suggest that the choice between the two should be based on the level of recall, precision and/or computational performance required.</p> |                      |
| <b>Corresponding Author:</b>                         | Alexandre Almeida<br><br>UNITED KINGDOM                                                                                                                                                                                                                                                                                                                                                                                                                                                                                                                                                                                                                                                                                                                                                                                                                                                                                                                                                                                                                                                                                                                                                                                                                                                                                                                                                                                                                                                                                                                                                                                                                                                                                 |                      |
| <b>Corresponding Author Secondary Information:</b>   |                                                                                                                                                                                                                                                                                                                                                                                                                                                                                                                                                                                                                                                                                                                                                                                                                                                                                                                                                                                                                                                                                                                                                                                                                                                                                                                                                                                                                                                                                                                                                                                                                                                                                                                         |                      |
| <b>Corresponding Author's Institution:</b>           |                                                                                                                                                                                                                                                                                                                                                                                                                                                                                                                                                                                                                                                                                                                                                                                                                                                                                                                                                                                                                                                                                                                                                                                                                                                                                                                                                                                                                                                                                                                                                                                                                                                                                                                         |                      |
| <b>Corresponding Author's Secondary Institution:</b> |                                                                                                                                                                                                                                                                                                                                                                                                                                                                                                                                                                                                                                                                                                                                                                                                                                                                                                                                                                                                                                                                                                                                                                                                                                                                                                                                                                                                                                                                                                                                                                                                                                                                                                                         |                      |
| <b>First Author:</b>                                 | Alexandre Almeida                                                                                                                                                                                                                                                                                                                                                                                                                                                                                                                                                                                                                                                                                                                                                                                                                                                                                                                                                                                                                                                                                                                                                                                                                                                                                                                                                                                                                                                                                                                                                                                                                                                                                                       |                      |
| <b>First Author Secondary Information:</b>           |                                                                                                                                                                                                                                                                                                                                                                                                                                                                                                                                                                                                                                                                                                                                                                                                                                                                                                                                                                                                                                                                                                                                                                                                                                                                                                                                                                                                                                                                                                                                                                                                                                                                                                                         |                      |
| <b>Order of Authors:</b>                             | Alexandre Almeida                                                                                                                                                                                                                                                                                                                                                                                                                                                                                                                                                                                                                                                                                                                                                                                                                                                                                                                                                                                                                                                                                                                                                                                                                                                                                                                                                                                                                                                                                                                                                                                                                                                                                                       |                      |
|                                                      | Alex L Mitchell                                                                                                                                                                                                                                                                                                                                                                                                                                                                                                                                                                                                                                                                                                                                                                                                                                                                                                                                                                                                                                                                                                                                                                                                                                                                                                                                                                                                                                                                                                                                                                                                                                                                                                         |                      |
|                                                      | Aleksandra Tarkowska                                                                                                                                                                                                                                                                                                                                                                                                                                                                                                                                                                                                                                                                                                                                                                                                                                                                                                                                                                                                                                                                                                                                                                                                                                                                                                                                                                                                                                                                                                                                                                                                                                                                                                    |                      |
|                                                      | Robert D Finn                                                                                                                                                                                                                                                                                                                                                                                                                                                                                                                                                                                                                                                                                                                                                                                                                                                                                                                                                                                                                                                                                                                                                                                                                                                                                                                                                                                                                                                                                                                                                                                                                                                                                                           |                      |
| <b>Order of Authors Secondary Information:</b>       |                                                                                                                                                                                                                                                                                                                                                                                                                                                                                                                                                                                                                                                                                                                                                                                                                                                                                                                                                                                                                                                                                                                                                                                                                                                                                                                                                                                                                                                                                                                                                                                                                                                                                                                         |                      |
| <b>Response to Reviewers:</b>                        | Reviewer #1<br>=====                                                                                                                                                                                                                                                                                                                                                                                                                                                                                                                                                                                                                                                                                                                                                                                                                                                                                                                                                                                                                                                                                                                                                                                                                                                                                                                                                                                                                                                                                                                                                                                                                                                                                                    |                      |

Independent benchmarks like this are important for guiding methods choices for researchers. I enjoyed reading this study and feel that it will be valuable to readers. I have a few questions and suggestions below.

R: We appreciate the positive feedback from the reviewer and have addressed all his comments and suggestions below and in the revised manuscript.

In 20 - QIIME, mothur, and QIIME2 all utilize multiple different taxonomic classifiers. So multiple choices exist within each platform, there is no standard "mothur" or "QIIME" method (their defaults are essentially RDP classifier and a uclust-based classifier). It would be helpful to clarify this information in the text if not the abstract, e.g., the mothur classifier should be called RDP.

R: Based on both reviewers' comments, we have clarified this in the "Abstract" (lines 23-26), "Background" (lines 100-102) and "Discussion" sections (lines 262-264).

In 29 - QIIME2 also appears to have higher F-measure scores, perhaps this should be mentioned here.

R: We have now included this information in the "Abstract" (lines 29-31).

In 77-79 - what about the QIIME2 pre-print cited below? it does not cover Mapeq but is a benchmark of a number of different commonly used classifiers and marker-gene regions (albeit not an independent comparison).

R: We have now referenced this paper in the revised manuscript (lines 79-80).

In 91-93 - what about the strengths of mock communities/weaknesses of simulation? this section seems to imply that mock communities are necessarily inferior, and simulations are not prone to their own limitations.

R: We agree with the reviewer and have now highlighted the importance of using both mock communities and in silico approaches in the "Background" section (lines 91-98).

In 121 - variation is realistic, but not entirely random variation. Why not mutate simulated sequences after extracting the variable regions? It seems that much of the variation may otherwise fall outside of the variable regions and not impact this simulation.

R: We agree with the reviewer and have re-generated our simulated reads by mutating the sequences after extracting the variable regions instead. The new results are depicted in the revised version of the manuscript but show no significant differences to the original results presented. We have also replaced the original FASTQ files with this new set in the GigaDB FTP site.

In 141-143 - why not at least show species-level results in the supplement if not main text? It is important to demonstrate why researchers should be cautious about species-level classifications.

R: We decided not to present the species-level assignment due to two main reasons: i) it has already been previously described (Golob, et al. 2017, PMID: 28558684) that 16S rRNA gene classification with amplicon-based sequences is severely limited at the species level, with only ~ 12% of correctly assigned sequences, and miscall rates of ~ 20%; ii) there is significant inconsistency in species nomenclature between the databases we tested (e.g. many species are just labelled "[Genus] sp.", whereas the RDP database does not even output species assignments), which would make an assessment of recall/precision challenging and possibly misleading, especially given the low number of assigned sequences. We have now made this clearer in the revised manuscript as well (lines 149-155).

In 242 - parameter selection will greatly impact precision/recall scores, and e.g. increasing confidence thresholds for QIIME2 or mothur classifiers will improve precision at the expense of recall. Mapeq may have similar performance tradeoffs —

but overall I wonder if altering confidence thresholds for these other methods can approach the miscall rate of mapseq. At the very least, this should be mentioned in the discussion. The QIIME2 classifier pre-print cited by this work covers parameter permutations that maximize recall/precision (the default maximizes F-measure).

R: In this paper the aim was to assess the recommended and most widely-used parameters for each tool, as these will be what most users will likely be using in their analyses. We agree that tweaking individual settings might provide improvements to recall/precision estimates for each pipeline, but this was beyond the scope of this work and would have increased the number of comparisons performed exponentially. Therefore, as per the reviewer's suggestion we have now discussed this topic in the "Discussion" section of the revised manuscript (lines 262-264).

Reviewer #2

=====

#### # Overview

In this paper the authors have sought to evaluate the performance of the 4 main packages and their default classifiers/settings used in the taxonomic profiling of rRNA sequences. They did this using synthetic simulated read sets representative of 3 commonly studied microbiome environments and investigated the role of locus and reference database selection on classification metrics.

This is well done research that will form a useful benchmark for researchers engaged in rRNA taxonomic profiling to help design and conduct their own studies.

R: We thank the reviewer's positive remarks and have addressed all his comments below and in the revised manuscript.

#### ## General Comments

It should be emphasised throughout the manuscript that as of January 1st 2018, QIIME1 is deprecated and no longer supported by the developers (<https://qiime.wordpress.com/2018/01/03/qiime-2-has-succeeded-qiime-1/>). Therefore, QIIME1 is no longer recommended to be used at all.

R: We have now mentioned this in the "Background" (lines 69-71) and "Discussion" sections (lines 246-248).

Secondly, it is probably worth emphasising that QIIME1, QIIME2 and mothur are very large toolsets with many parts and functions capable of more than just taxonomic assignment. Even for taxonomic assignment specifically, it could do with being clarified that mothur (RDP port, k-nearest neighbours, wang k-mer method) and QIIME (UCLUST, RDP, rtax, sortmerna, mothur's methods etc) implement a variety of optional alternative taxonomic classifiers. Comparing the performance of the default classifiers with default settings is very useful as that is what most users will end up using but it should be made clear in the manuscript that this work doesn't investigate these package options beyond database selection.

R: We have now included this information in the "Background" (lines 60-64) and "Discussion" sections (lines 262-264).

#### ## Minor Comments

Line 59: Possibly should be emphasised that mothur, QIIME, and QIIME2 are large packages with lots of functions and uses beyond taxonomic assignment.

R: We have now added this information to the revised manuscript (lines 60-62).

Line 68: Although the RDP classifier can also be used optionally within QIIME fairly easily (although as the authors have stated is not default).

R: We have now mentioned the possibility of using different classifiers in the "Discussion" section (lines 262-264).

Line 69: Mothur doesn't wrap RDP but totally reimplements RDP in C++ (<http://blog.mothur.org/2016/01/12/mothur-and-qiime/>)

R: We have now clarified this as per the reviewer's suggestion (lines 67-69).

Line 70: Worth highlighting that QIIME2 is intended to totally replace QIIME.

R: As mentioned above, we have now included this information in both the "Background" (lines 69-71) and "Discussion" sections (lines 246-248).

Line 124: Please add a citation for these primers if possible.

R: References for each primer set have now been added to the text (lines 129 and 329) and the accompanying supplementary table (Table S1).

Line 125: Can you clarify why RDP and MAPseq NCBI databases weren't used in this primer analysis?

R: We initially decided to focus on SILVA and Greengenes since they are most frequently used databases. However, we have now included the results for RDP and NCBI as well in the revised manuscript (lines 129-139 and Fig. S2).

Line 143: Has anyone done an analysis supporting the too limited resolution of this locus for species level classification?

R: In another benchmarking paper (Golob, et al. 2017, PMID: 28558684) it was shown that QIIME and mothur can only assign ~ 12% of 16S rRNA amplicon sequences to the correct species, while additionally presenting a miscall rate of ~ 21%. We have now cited this reference in the revised manuscript (line 150).

Line 151: Can you add the microbiome environment specific performance metrics for each tool as a (possibly supplemental) table instead of just the averaged metrics as report in Table 1? Acknowledging this involves some degree of overlap/redundancy to Figure 2.

R: We have now provided this information in three new supplementary tables (Tables S2, S3 and S4).

Line 208: As with the previous comment, despite the more detailed heatmap breakdown in Figure 4. It would be nice to see the overall dissimilarity metrics presented unaggregated by method and biome in a supplemental table.

R: This information has now also been added to the above-mentioned tables (Tables S2, S3 and S4).

Line 238: It might be good to further emphasize that it supports the developer's decision to no longer support QIIME v1, especially with the tendency of outdated bioinformatics to linger and be widely used!

R: As stated above, we have now mentioned this in the "Background" (lines 69-71) and "Discussion" sections (lines 246-248).

Line 246: Do you believe this is likely to be due to overhead from QIIME2's zipping and unzipping of input files?

R: From our experience, QIIME 2's computational demand appears to be more significantly affected by the size of the database. It is possible that this is influenced by the uncompressing and compressing of the QZA files (the proprietary format used by QIIME 2), but we prefer not to speculate on this matter.

Line 251: Could add emphasis that these unevaluated alternatives includes other

|                                |                                                                                                                                                                                                                                                                                                                                                                                                                                                                                                                                                                                                                                                                                                                                                                                                                                                                                                                                                                                                                                                                                                                                                                                                                                                                                                                                                                                                                                                                                                                                                                                                                                                                                                                                                                                                                                                                                                                                                                                                                                                                                                                                                                                                                                                                                                                                                                                                                                                                                                                                                                                                                                                                                                                                                                                                                                                                                                                                                                                                                                                                                                                                                                                                                                                                                                                                                                                                                                                        |
|--------------------------------|--------------------------------------------------------------------------------------------------------------------------------------------------------------------------------------------------------------------------------------------------------------------------------------------------------------------------------------------------------------------------------------------------------------------------------------------------------------------------------------------------------------------------------------------------------------------------------------------------------------------------------------------------------------------------------------------------------------------------------------------------------------------------------------------------------------------------------------------------------------------------------------------------------------------------------------------------------------------------------------------------------------------------------------------------------------------------------------------------------------------------------------------------------------------------------------------------------------------------------------------------------------------------------------------------------------------------------------------------------------------------------------------------------------------------------------------------------------------------------------------------------------------------------------------------------------------------------------------------------------------------------------------------------------------------------------------------------------------------------------------------------------------------------------------------------------------------------------------------------------------------------------------------------------------------------------------------------------------------------------------------------------------------------------------------------------------------------------------------------------------------------------------------------------------------------------------------------------------------------------------------------------------------------------------------------------------------------------------------------------------------------------------------------------------------------------------------------------------------------------------------------------------------------------------------------------------------------------------------------------------------------------------------------------------------------------------------------------------------------------------------------------------------------------------------------------------------------------------------------------------------------------------------------------------------------------------------------------------------------------------------------------------------------------------------------------------------------------------------------------------------------------------------------------------------------------------------------------------------------------------------------------------------------------------------------------------------------------------------------------------------------------------------------------------------------------------------------|
|                                | <p>classifiers and settings within the software packages that were tested in this paper.</p> <p>R: We have now mentioned this in the “Discussion” (lines 262-264).</p> <p>Line 312: Using this script's default maximum primer mismatch of 3?<br/> Line 315: What platform error profile was used when simulating reads with ART? MSv3?</p> <p>R: Yes, we used the default primer mismatch of 3 and the MiSeq v3 error profile with ART. We have added this information to the “Methods” section (lines 326-335).</p> <p>Line 337: Why was 99% clustered SILVA used for QIIME2 but 97% for QIIME1?</p> <p>R: QIIME by default makes use of the Greengenes database clustered at 97%. To make a fair comparison across QIIME, we decided to cluster the SILVA database at the same level. On the other hand, the tutorials and standard operating procedures (SOP) of QIIME 2 advise and provide pre-trained databases of Greengenes and SILVA only at 99%. We hypothesize that these differences in the preferred clustering threshold might be related to the distinct assignment pipelines and default methods between the tools (UCLUST in QIIME vs. the Naïve Bayes classifier in QIIME 2).</p> <p>Line 361: Presumably on a system under no other load? Was this run once or rerun a few times to determine variance of memory/cpu usage?</p> <p>R: To assess the computational cost we calculated the average CPU time and memory usage across three different data points (one for each biome) after running each analysis in our cluster here at the EBI (which allocates the resources required for each job). We have now added error bars with the standard deviation to Fig. 3, showing the high consistency of these measurements.</p> <p>References: Inconsistent capitalisation of titles, inclusion of editors and publisher information (mainly Nature Publishing Group) but others from the same publisher don't e.g. ref 4.</p> <p>R: We have now corrected these formatting issues.</p> <p>Figure 3 Legend: Is the SILVA database referenced here at different 97-99% clustering levels mentioned?</p> <p>R: In the original manuscript we used the 97% clustered SILVA database for QIIME and the 99% one for QIIME 2. We realized that for assessing the computational cost this might be misleading, so we have now modified the analyses to use the same SILVA database across all comparisons (at a 99% clustering threshold). We have now also clarified this in the text (lines 380-382).</p> <p>Figure S3: Explain and/or cite not using greengenes due to the alignment issue? It does seem not recommended. The methods section may benefit from inclusion of this database information.</p> <p>R: We have now included this information in the revised manuscript (lines 355-356) and in the Fig. S3 legend (lines 457-458), with a citation to the mothur SOP.</p> <p>Figure S4: Would be nice to include a key as per Figure 1 instead of needing to cross-reference to the tables.</p> <p>R: Although we agree with the reviewer, given that the miscalled taxa correspond to over 100 different genera, it would be very challenging to have a figure key with discernible colours for each genus (especially given how small some of the stacked bars are). We realize it is not an ideal solution, but we have decided to leave that information as separate supplementary tables (now Tables S5, S6 and S7).</p> |
| <b>Additional Information:</b> |                                                                                                                                                                                                                                                                                                                                                                                                                                                                                                                                                                                                                                                                                                                                                                                                                                                                                                                                                                                                                                                                                                                                                                                                                                                                                                                                                                                                                                                                                                                                                                                                                                                                                                                                                                                                                                                                                                                                                                                                                                                                                                                                                                                                                                                                                                                                                                                                                                                                                                                                                                                                                                                                                                                                                                                                                                                                                                                                                                                                                                                                                                                                                                                                                                                                                                                                                                                                                                                        |
| <b>Question</b>                | <b>Response</b>                                                                                                                                                                                                                                                                                                                                                                                                                                                                                                                                                                                                                                                                                                                                                                                                                                                                                                                                                                                                                                                                                                                                                                                                                                                                                                                                                                                                                                                                                                                                                                                                                                                                                                                                                                                                                                                                                                                                                                                                                                                                                                                                                                                                                                                                                                                                                                                                                                                                                                                                                                                                                                                                                                                                                                                                                                                                                                                                                                                                                                                                                                                                                                                                                                                                                                                                                                                                                                        |

|                                                                                                                                                                                                                                                                                                                                                                                                                                                                                                                                                         |            |
|---------------------------------------------------------------------------------------------------------------------------------------------------------------------------------------------------------------------------------------------------------------------------------------------------------------------------------------------------------------------------------------------------------------------------------------------------------------------------------------------------------------------------------------------------------|------------|
| <p>Are you submitting this manuscript to a special series or article collection?</p>                                                                                                                                                                                                                                                                                                                                                                                                                                                                    | <p>No</p>  |
| <p><b>Experimental design and statistics</b></p> <p>Full details of the experimental design and statistical methods used should be given in the Methods section, as detailed in our <a href="#">Minimum Standards Reporting Checklist</a>. Information essential to interpreting the data presented should be made available in the figure legends.</p> <p>Have you included all the information requested in your manuscript?</p>                                                                                                                      | <p>Yes</p> |
| <p><b>Resources</b></p> <p>A description of all resources used, including antibodies, cell lines, animals and software tools, with enough information to allow them to be uniquely identified, should be included in the Methods section. Authors are strongly encouraged to cite <a href="#">Research Resource Identifiers</a> (RRIDs) for antibodies, model organisms and tools, where possible.</p> <p>Have you included the information requested as detailed in our <a href="#">Minimum Standards Reporting Checklist</a>?</p>                     | <p>Yes</p> |
| <p><b>Availability of data and materials</b></p> <p>All datasets and code on which the conclusions of the paper rely must be either included in your submission or deposited in <a href="#">publicly available repositories</a> (where available and ethically appropriate), referencing such data using a unique identifier in the references and in the “Availability of Data and Materials” section of your manuscript.</p> <p>Have you have met the above requirement as detailed in our <a href="#">Minimum Standards Reporting Checklist</a>?</p> | <p>Yes</p> |

1 **Benchmarking taxonomic assignments based on 16S rRNA gene profiling**  
2 **of the microbiota from commonly sampled environments**

3

4 Alexandre Almeida<sup>1,2,\*</sup>, Alex L. Mitchell<sup>1</sup>, Aleksandra Tarkowska<sup>1</sup> and Robert D. Finn<sup>1</sup>

5

6 <sup>1</sup>EMBL-EBI European Bioinformatics Institute, Wellcome Genome Campus, Hinxton,  
7 Cambridge CB10 1SD, UK; <sup>2</sup>Wellcome Trust Sanger Institute, Wellcome Genome Campus,  
8 Hinxton CB10 1SA, UK

9

10 \*Corresponding author:

11 Alexandre Almeida,

12 EMBL-EBI European Bioinformatics Institute,

13 Wellcome Trust Genome Campus, Hinxton, Cambridge CB10 1SD, UK

14 Tel + 44 (0) 1223 494 468 E-mail: [aalmeida@ebi.ac.uk](mailto:aalmeida@ebi.ac.uk)

15

16 ORCID IDs: Alexandre Almeida: [0000-0001-8803-0893](https://orcid.org/0000-0001-8803-0893); Alex L. Mitchell: 0000-0001-8655-  
17 7966; Aleksandra Tarkowska: 0000-0002-3392-3691; Robert D. Finn: 0000-0001-8626-2148

18

19 **Keywords:** 16S rRNA gene, human gastrointestinal tract, ocean, microbiome, soil, taxonomy

20

1  
2  
3  
4  
5  
6  
7  
8  
9  
10  
11  
12  
13  
14  
15  
16  
17  
18  
19  
20  
21  
22  
23  
24  
25  
26  
27  
28  
29  
30  
31  
32  
33  
34  
35  
36  
37  
38  
39  
40  
41  
42  
43  
44  
45  
46  
47  
48  
49  
50  
51  
52  
53  
54  
55  
56  
57  
58  
59  
60  
61  
62  
63  
64  
65

21 **Abstract**

22 **Background:** Taxonomic profiling of ribosomal RNA (rRNA) sequences has been the  
23 accepted norm for inferring the composition of complex microbial ecosystems. QIIME and  
24 mothur have been the most widely used taxonomic analysis tools for this purpose, with  
25 MAPseq and QIIME 2 being two recently released alternatives. However, no independent  
26 and direct comparison between these four main tools has been performed. Here, we compared  
27 the default classifiers of MAPseq, mothur, QIIME, and QIIME 2 using synthetic simulated  
28 datasets comprised of some of the most abundant genera found in the human gut, ocean and  
29 soil environments. We evaluate their accuracy when paired with both different reference  
30 databases and variable sub-regions of the 16S rRNA gene.

31  
32 **Findings:** We show that QIIME 2 provided the best recall and F-scores at genus and family  
33 levels, together with the lowest distance estimates between the observed and simulated  
34 samples. However, MAPseq showed the highest precision, with miscall rates consistently  
35 below 2%. Notably, QIIME 2 was the most computationally expensive tool, with CPU time  
36 and memory usage almost two and 30 times higher than MAPseq, respectively. Using the  
37 SILVA database generally yielded a higher recall than using Greengenes, while assignment  
38 results of different 16S rRNA variable sub-regions varied up to 40% between samples  
39 analysed with the same pipeline.

40  
41 **Conclusions:** Our results support the use of either QIIME 2 or MAPseq for optimal 16S  
42 rRNA gene profiling, and we suggest that the choice between the two should be based on the  
43 level of recall, precision and/or computational performance required.

44

45



## 46 **Findings**

### 47 **Background**

48 Genome sequencing has provided an unprecedented view of the microbial diversity of  
49 ecosystems from wide-ranging environments. For example, the commensal flora of the  
50 human gut has been extensively explored for potential associations with the onset of many  
51 human diseases [1–3]. Similarly, the rich microbial diversity of environments such as soil and  
52 oceans have been studied in depth, yielding important ecological inferences [4–6]. There are  
53 now a substantial number of such microbial community datasets deposited in sequence  
54 archives (for example, the European Nucleotide Archive currently holds over 600 000  
55 environmental samples [7]) and the rate of deposition is increasing. Drawing relevant  
56 biological correlations from this vast amount of data requires accurate and reliable tools and  
57 methods.

58  
59 One of the crucial steps in almost all microbiome-based analyses is inference of community  
60 composition through taxonomic classification. For a few decades now [8], the common  
61 approach for taxonomic assignment of microbial species has been the classification of  
62 ribosomal RNA (rRNA) sequences. Currently, the most widely used tools for this purpose are  
63 the mothur [9] and “Quantitative Insights Into Microbial Ecology” (QIIME) software  
64 packages [10]. These correspond to large toolsets that are able to process, classify and  
65 perform downstream analyses on individual genetic markers (e.g. the 16S rRNA gene,  
66 conserved across the prokaryotic domains). For taxonomic classification, each tool compares  
67 a set of queried sequences against a defined reference database, such as Greengenes [11],  
68 NCBI [12], RDP [13] or SILVA [14], assigning the most likely taxonomic lineages.  
69 Ultimately, the success of these analyses is not only dependent on the breadth and diversity  
70 of annotated sequences available in public repositories, but also on the accuracy of the

1  
2  
3  
4  
5  
6  
7  
8  
9  
10  
11  
12  
13  
14  
15  
16  
17  
18  
19  
20  
21  
22  
23  
24  
25  
26  
27  
28  
29  
30  
31  
32  
33  
34  
35  
36  
37  
38  
39  
40  
41  
42  
43  
44  
45  
46  
47  
48  
49  
50  
51  
52  
53  
54  
55  
56  
57  
58  
59  
60  
61  
62  
63  
64  
65

71 classification algorithms used by each of the tools. By default, QIIME makes use of the  
72 UCLUST clustering method [15] to assign biological sequences to a reference database,  
73 while mothur reimplements the naïve Bayesian RDP classifier, developed by Wang, *et al.*  
74 [16]. Two other tools — MAPseq [17] and QIIME 2 (<https://qiime2.org/>) — have recently  
75 been released, the latter of which has officially replaced QIIME as of January, 2018. QIIME  
76 2 also makes use of a naïve Bayes classifier [18], and MAPseq is a *k-mer* search approach  
77 that outputs confidence estimates at different taxonomic ranks.

78  
79 A community-driven initiative known as the “Critical Assessment of Metagenome  
80 Interpretation” (CAMI) benchmarked a range of software tools for the analysis of shotgun  
81 metagenomic datasets [19]. In regard to amplicon-based approaches, previous studies have  
82 mainly evaluated the classification methods of QIIME and mothur, highlighting some of their  
83 advantages and pitfalls [20–22]. The recent publication of QIIME 2 also included the  
84 assessment of a number of different commonly used classifiers and marker gene regions [18].  
85 However, until now, no independent study has compared the accuracy of MAPseq, mothur,  
86 QIIME and QIIME 2 whilst also taking into account potential differences arising from the  
87 use of distinct reference databases. Furthermore, for genotyping the 16S rRNA gene there is  
88 also much debate within the scientific community on the most informative variable sub-  
89 region to target [23]. Strong arguments have been made towards sequencing specific or  
90 combined sub-regions, such as the V4 [24] and V3-V4 [25], while difficulty in amplifying  
91 bacterial species, such as those from the *Actinobacteria* group, has prompted the  
92 development of more specialized primers [26,27]. The impact of variable region choice on  
93 the taxonomic classification performance of different tools or databases is therefore also  
94 important to assess.

1 96 The use of mock communities in microbiome studies has revealed that different experimental  
2 97 conditions and methods dramatically affect the quality of the results [28–31]. In contrast, *in*  
3  
4 98 *silico* benchmarking approaches provide an agnostic view on the efficiency of the  
5  
6  
7 99 computational pipelines — independently of experimental variation and technical biases —  
8  
9  
10 100 but may require further validation in real-world datasets. Hence, for a holistic assessment of  
11  
12 101 the validity of different methodological strategies, using both mock communities and *in silico*  
13  
14 102 simulations is essential to understand the biases and limitations present at each stage of  
15  
16  
17 103 analysis.

18  
19 104

20  
21  
22 105 In this work we have leveraged a set of simulated 16S rRNA gene sequences representative  
23  
24 106 of genera commonly found in the human gut, ocean and soil environments, to evaluate the  
25  
26 107 accuracy of the default taxonomic classifiers of MAPseq, mothur, QIIME and QIIME 2. We  
27  
28  
29 108 tested these methods with different reference databases, and according to some of the most  
30  
31 109 commonly targeted sub-regions of the 16S rRNA gene. Our results showed that, regardless of  
32  
33  
34 110 the database used, QIIME 2 outperformed all other tools in terms of overall recall at both  
35  
36 111 genus and family levels, as well as in distance estimations between the observed and  
37  
38  
39 112 predicted samples. Considerable performance differences were observed between using  
40  
41 113 distinct 16S rRNA gene sub-regions, while limited software-dependent variation was seen  
42  
43  
44 114 between different reference databases. We believe this work will help inform microbial  
45  
46 115 ecologists about important decisions to take when designing new 16S rRNA-based  
47  
48  
49 116 community studies.

50  
51 117

## 52 53 54 118 **Composition of the simulated datasets**

55  
56 119 The microbiota colonizing the human gut, ocean and soil environments are some of the most  
57  
58  
59 120 frequently studied microbial communities. Hence, to provide data with direct practical

60  
61  
62  
63  
64  
65

121 applications, we focused on simulating datasets containing a diverse set of genera commonly  
122 found in these three ecosystems (Additional file: Fig. S1). Representative genera were  
123 selected after identifying the 80 most abundant genera across publicly available metagenomes  
124 from human gut, ocean and soil [7]. Then, for each biome, four different communities were  
125 generated with two levels of diversity: samples A100 and B100 with a random set of 100  
126 species belonging to these genera; and A500 and B500 with 500 species. Final datasets  
127 comprised a total of 66, 66 and 76 different genera from the human gut, oceanic and soil  
128 environments, respectively. For the purpose of this benchmarking, we simulated the datasets  
129 with a similar relative abundance per genus to avoid introducing any taxon-specific biases  
130 (Additional file: Fig. S1).

131  
132 To simulate a realistic scenario, where variation can arbitrarily occur and sequences may not  
133 have an exact representative in public databases, we randomly mutated 2% of the positions of  
134 each 16S rRNA sequence retrieved after extracting each sub-region using commonly used  
135 primer sequences [25,26,32–34] (Additional file: Table S1). Notably, the percentage of  
136 sequences retrieved from the Greengenes, NCBI, RDP and SILVA databases matching the  
137 primers selected for V1-V2 was dramatically lower (30.3%) than that of V3-V4 (90%), V4  
138 (90.9%) and V4-V5 (87.8%) (Additional file: Fig. S2). The 16S rRNA V1 sub-region had  
139 been previously found to be truncated in a substantial number of reference sequences [23].  
140 Our results confirm this observation and again raise caution at the use of the 16S V1-V2  
141 rRNA primer sequences for complex and diverse samples, due to the reduced number of  
142 reference sequences available. Interestingly, the relative number of sequences retrieved from  
143 RDP was lower than that of the remaining databases (Additional file: Fig. S2), likely  
144 suggesting an overrepresentation of more divergent taxa that did not meet the mismatch  
145 threshold used in our *in silico* PCR.

146

1  
2 **147 Taxonomic assignment**  
3

4  
5 148 Microbiome studies frequently strive to associate microbial diversity signatures with a  
6  
7 149 phenotype of interest. However, focusing solely on high-level taxonomic ranks can severely  
8  
9 150 underestimate the degree of variation observed between sample groups. To circumvent this,  
10  
11 151 highly discriminative approaches are needed to be able to pinpoint the most significant taxa  
12  
13 152 warranting further validation. For assessing the performance of MAPseq, mothur, QIIME and  
14  
15 153 QIIME 2 with different reference databases (Additional file: Fig. S3), we limited our analyses  
16  
17 154 to classification at the lineage level instead of operational taxonomic units (OTUs), as it  
18  
19 155 allows a more consistent and easier interpretation of the results. Species assignment of every  
20  
21 156 queried sequence would be the desired outcome, but as was previously shown [20], the  
22  
23 157 limited resolution of the 16S rRNA locus precludes an accurate classification at this level.  
24  
25 158 Furthermore, there is significant inconsistency in species nomenclature across all reference  
26  
27 159 databases (e.g. RDP does not report taxon names below genus). In this work, we calculated  
28  
29 160 the degree of recall and precision at the genus and family ranks, as in our opinion they  
30  
31 161 provide the best compromise between classification accuracy and resolution.  
32  
33  
34  
35  
36  
37  
38  
39

162

40  
41 163 By comparing the level of recall across all software tools, we found that QIIME 2 recovered  
42  
43 164 the largest proportion of sequences from the expected genera (Table 1, Fig. 1 and Additional  
44  
45 165 files: Tables S2, S3 and S4). Combined with the SILVA database, this resulted in the highest  
46  
47 166 recall (sensitivity) for human gut (67.0%) and soil samples (68.3%), while the Greengenes  
48  
49 167 database outperformed in the case of the oceanic microbiome (79.5%). In fact, all tools  
50  
51 168 except QIIME saw a decrease in recall when using SILVA specifically for the classification  
52  
53 169 of the oceanic dataset. Globally, however, SILVA most frequently provided a better genus  
54  
55 170 recall than Greengenes (five out of nine comparisons across MAPseq, QIIME and QIIME 2,  
56  
57  
58  
59  
60  
61  
62  
63  
64  
65

171 Fig. 1). In terms of correctly identified taxa, MAPseq in conjunction with SILVA detected  
172 the greatest number of expected genera in all three biomes (Fig. 1). At the family level, all  
173 tools presented a substantially higher recall (Table 1), with QIIME 2 reaching 94.3% in the  
174 human gut sample, 96.2% with the ocean set and 91.7% with the soil sample (Additional  
175 files: Tables S2, S3 and S4).

176  
177 Although the level of recall is a crucial metric in choosing the most appropriate taxonomic  
178 classification pipeline, it is equally important to ensure a low frequency of false-positive  
179 assignments. We evaluated the degree of precision (specificity) by the percentage of  
180 sequences assigned to the wrong taxon (Additional files: Tables S5, S6, S7) out of all the  
181 detected taxa. Accuracy was high for all the tools, with precision estimates of at least 84%  
182 across all analysis pipelines (Fig. 2A). In terms of total number of sequences, this translated  
183 to less than 10% of the reads misassigned at the genus level (Additional files: Tables S2, S3,  
184 S4 and Fig. S4). MAPseq with the SILVA database consistently outperformed all other tools,  
185 with a precision above 96% for the three tested biomes (Fig. 2A), equating to less than 2% of  
186 miscalled sequences.

187  
188 To combine both recall and precision into a single metric, we calculated the F-score for all  
189 taxonomic assignments (Fig. 2A and and Fig. S5). At both genus and family levels, we found  
190 that QIIME 2 had the highest score across the samples representative of the three different  
191 biomes, with the SILVA database coming out on top for the human gut (genus: 78.9%,  
192 family: 96.8%, Additional file: Table S2) and soil (genus: 78.5%, family: 94.3%, Additional  
193 file: Table S4) environments in particular, but the Greengenes database performing better  
194 with the oceanic dataset (genus: 87.4%, family: 97.4%, Additional file: Table S3). After  
195 fractioning the data according to different sub-regions of the 16S rRNA gene, we then

196 repeated the same analysis (Fig. 2B). This revealed that the performance of each tool varied  
197 up to 40% depending on the 16S rRNA sub-region targeted. Notably, the V1-V2 or V3-V4  
198 sub-regions performed the best across most of the pipelines (Fig. 2B). In our study, each  
199 synthetic species had a genetically close full-length 16S rRNA sequence represented in the  
200 databases, so our tests were probably not significantly affected by the reduced number of V1-  
201 V2 reference sequences available.

202  
203 The ongoing surge in genome sequencing is producing thousands of novel sequences each  
204 year. Therefore, efficient tools that can scale up to provide analysis of tens of thousands of  
205 samples is increasingly important. With this in mind, we compared the computational  
206 performance of MAPseq, mothur, QIIME and QIIME 2 throughout the whole classification  
207 pipeline of our simulated datasets. We analysed average memory usage and CPU time across  
208 the three biomes for the processing and assignment of 3 million quality-filtered sequences  
209 against the SILVA 128 database (Fig. 3). MAPseq was the most memory-efficient tool, with  
210 mothur, QIIME and QIIME 2 requiring over 72, 15 and 27 times more memory resources,  
211 respectively (Fig. 3A). CPU time of QIIME 2 was the highest, close to twice that of MAPseq,  
212 and almost 100 times longer than QIIME, which was the fastest (Fig. 3B). Of note is that  
213 each pipeline has its own processing procedure; both the mothur and QIIME 2 pipelines  
214 included a de-replication step of the query sequences prior to taxonomic assignment, which  
215 substantially reduced the number of sequences used for classification.

216

### 217 **Relative quantification and beta diversity**

218 One of the main aspects of any microbiome-based analysis is the assessment of the  
219 differential abundance and beta diversity across a set of sample groups. In this respect,  
220 accurate estimation of the relative abundance of each taxon is essential to find statistically

221 significant patterns. To assess how accurately each tool was able to predict taxa relative  
222 abundances in each sample, we calculated dissimilarity scores (DS) for each genus present in  
223 the simulated dataset (Fig. 4). Interestingly, QIIME 2 showed the most accurate prediction in  
224 relation to the true genera composition, with an average DS of 0.33 when used in conjunction  
225 with the SILVA database (Table 1). In terms of the reference database used, analyses carried  
226 out with SILVA yielded more accurate predictions than with the Greengenes database  
227 (Additional files: Tables S2, S3 and S4). Substantial differences in accuracy were observed  
228 across different genera, with sequences from the *Paraprevotella* genus — frequently present  
229 in human gut samples — more accurately predicted, in contrast to those from *Coprobacter*,  
230 *Hyphomicrobium* and *Thalassobacter*, which had the worst results (Fig. 4). These genera  
231 might either be underrepresented in the reference databases or have a high degree of  
232 conservation with other closely related taxa, making accurate taxonomic assignments more  
233 challenging.

234  
235 For a global assessment of the beta diversity across samples, we performed a principal  
236 coordinates analysis (PCoA) and calculated both Bray-Curtis and Jaccard distances between  
237 the observed and expected results. Both distance methods represent complementary  
238 approaches, as the Bray-Curtis metric corresponds to a quantitative evaluation of the  
239 dissimilarity across samples, whereas the Jaccard index is a qualitative measure of  
240 community similarity. We found that samples analysed with QIIME 2 were the closest (i.e.  
241 had the lowest distance estimate) to the true simulated datasets, with minor differences  
242 between the use of SILVA or Greengenes with both the Bray-Curtis and Jaccard methods  
243 (Table 1; Fig. 5).

## 245 Discussion



1  
2  
3  
4  
5  
6  
7  
8  
9  
10  
11  
12  
13  
14  
15  
16  
17  
18  
19  
20  
21  
22  
23  
24  
25  
26  
27  
28  
29  
30  
31  
32  
33  
34  
35  
36  
37  
38  
39  
40  
41  
42  
43  
44  
45  
46  
47  
48  
49  
50  
51  
52  
53  
54  
55  
56  
57  
58  
59  
60  
61  
62  
63  
64  
65

246 With the number of tools, databases and options available for taxonomic classification of  
247 marker sequences, it can be a daunting task to decide the optimal approach for analysis of a  
248 specific dataset. In this work, we have strived to help guide this decision-making process by  
249 independently assessing the performance of the most commonly used taxonomic assignment  
250 strategies with simulated samples comprised of genera found in frequently sampled  
251 environments.

252 Overall, we show that all tools we tested performed moderately well, with high precision and  
253 modest-to-high recall rates at the genus level. QIIME 2 presents significant improvements  
254 over the other tools, particularly over the preceding version of QIIME, in regard to detection  
255 sensitivity at both family and genus level. It should be emphasized that as of January, 2018  
256 QIIME has been replaced by QIIME 2 and the former tool is no longer supported by the  
257 developers. The superiority of QIIME 2 also held true for the prediction of sample  
258 composition, as beta diversity estimates between the analysed and simulated communities  
259 were the closest using this method. Therefore, these data support the use of QIIME 2 to  
260 obtain the largest proportion of classified sequences at the most accurate relative abundances.  
261 Nevertheless, the results also showed MAPseq to be a more conservative and precise  
262 approach, meaning that fewer genera were misassigned. In addition, this tool showed  
263 considerably better computational performance than QIIME 2, requiring approximately 30  
264 times less memory and almost half the CPU time to process the same dataset (even though  
265 QIIME 2 classifies substantially fewer query sequences due to a prior de-replication step).  
266 These results show that MAPseq provides a credible option if precision and computational  
267 performance or scale are a priority.

268  
269 Selecting a single best software package is not a straightforward affair, and we expect that  
270 further differences in performance will be observed with different real-world datasets.

1 271 Additionally, mothur and QIIME 2 also provide the option of using multiple taxonomic  
2 272 classifiers, so improvements in overall recall and/or precision metrics might be possible with  
3  
4 273 the other available methods, combined with further parameter optimization. We should also  
5  
6  
7 274 stress that, aside from the software packages we tested, other web-based tools such as  
8  
9  
10 275 BioMaS [22] are also available. However, they are usually restricted to the use of specific  
11  
12 276 reference databases, making individual customizations and accurate comparisons more  
13  
14 277 challenging.

16  
17 278 In addition to choosing the right tool, combining that with the appropriate reference database  
18  
19 279 is equally important to ensure the best classification performance. Greengenes and SILVA  
20  
21  
22 280 have been the most widely-used and readily supported databases. Generally, the SILVA 128  
23  
24 281 database performed better than Greengenes 13\_8 in terms of recall at both genus and family  
25  
26 282 levels, as well as in predicting the true taxa composition of the simulated communities.  
27  
28  
29 283 Conversely, there was an almost universal decrease in its performance in the detection of  
30  
31  
32 284 ocean-specific taxa, so special care should be taken in the analysis of datasets sampled from  
33  
34 285 this particular environment. Nonetheless, there are additional advantages to the use of  
35  
36 286 SILVA: it is more frequently updated (Greengenes was last updated in May 2013); it includes  
37  
38  
39 287 rRNA sequences of eukaryotic organisms in addition to archaea and bacterial species; and  
40  
41 288 has been shown to be more easily comparable and mapped to other taxonomies such as the  
42  
43  
44 289 NCBI [35]. In the case of MAPseq and mothur, the NCBI and RDP databases also performed  
45  
46 290 well, with higher recall but slightly lower precision scores compared to SILVA. Therefore,  
47  
48  
49 291 the SILVA, RDP or NCBI databases are all appropriate choices for a comprehensive and  
50  
51 292 accurate taxonomic analysis.

53 293

55  
56 294 The choice of primer sequences for taxonomic profiling of the 16S rRNA gene has been a  
57  
58 295 matter of frequent debate. In common with previously reported observations [27], we show  
59  
60  
61  
62  
63  
64  
65

296 that targeting different sub-regions can considerably influence the taxonomic assignment  
1  
2 297 performance (by up to 40% in our analyses). Overall, the V1-V2 and V3-V4 sub-regions  
3  
4 298 performed the best across most of the tools. However, the V1-V2 primers did not match  
5  
6 299 almost 70% of the sequences across the four reference databases, so we discourage its use for  
7  
8 300 classification of complex community samples. As our simulated datasets were generated  
9  
10 301 from close representatives containing full-length 16S rRNA genes, it is reasonable to assume  
11  
12 302 that our analysis of the V1-V2 sub-region was not significantly hampered by this reduced  
13  
14 303 number of reference sequences. Kozich *et al.* [24] have argued in favour of standardizing the  
15  
16 304 use of the V4 sub-region for Illumina MiSeq sequencing, as it allows complete overlap of  
17  
18 305 paired-end sequences, mitigating sequence errors introduced during PCR amplification or  
19  
20 306 sequencing. Phylogenetic studies have also showed that the V4 sub-region is the closest  
21  
22 307 representative of the phylogenetic signal of the whole 16S rRNA locus [23]. Here, we  
23  
24 308 analysed the performance of some of the most commonly used sub-regions under a purely  
25  
26 309 computational perspective, and conclude that amplification of the V3-V4 sub-region is most  
27  
28 310 frequently the best option for a reliable taxonomic inference.  
29  
30  
31  
32  
33  
34  
35

311

312 In summary, we have identified the major benefits and drawbacks of the most recent and  
39  
40 313 popular taxonomic classification methods. Importantly, we show that the choice of software,  
41  
42 314 database and sub-region significantly affects the quality of the classification results. Given  
43  
44 315 the impact of each of these variables, it is imperative to strive for consistency in the analysis  
45  
46 316 of samples not only within individual studies, but across different projects as well. Services  
47  
48 317 like the EBI Metagenomics [7] and MG-RAST [36] help provide a basis for standardization,  
49  
50 318 but additional factors relating to the experimental design are up to individual users to decide.  
51  
52 319 Some attempts have been made to find recommended best practices for 16S microbiome  
53  
54 320 studies among the myriad of options and issues that can arise at each analysis stage [37]. We  
55  
56  
57  
58  
59  
60  
61  
62  
63  
64  
65

1 321 believe our work presented here further complements these efforts by helping the  
2 322 microbiome research community make more informed decisions about the most appropriate  
3  
4 323 methodological approach to take in their own analysis pipeline.  
5  
6

7 324

8  
9 325

10  
11  
12 326

13  
14  
15 327

## 16 328 **Methods**

### 17 329 **Generating simulated datasets**

18  
19 330 Twelve sets of synthetic communities were generated for evaluating the accuracy of the  
20  
21 331 taxonomic assignment pipelines: four each for human gut, ocean and soil environments. First,  
22  
23 332 the 80 most abundant genera across publicly deposited samples from these biomes were  
24  
25 333 retrieved using the EBI Metagenomics API (<https://www.ebi.ac.uk/metagenomics/api/>) [7].  
26  
27

28  
29 334 This list was then used to randomly select either 100 (datasets A100 and B100) or 500  
30  
31 335 species (datasets A500 and B500) belonging to these genera, allowing a maximum of 20 and  
32  
33 336 50 species per genus, respectively. 16S rRNA gene sequences were obtained from the  
34  
35 337 European Nucleotide Archive (ENA), and an *in silico* PCR was carried out with a python  
36  
37 338 script ([https://github.com/simonrharris/in\\_silico\\_pcr](https://github.com/simonrharris/in_silico_pcr)) to extract commonly used regions for  
38  
39

40  
41 339 16S rRNA profiling [25,26,32–34] (Additional file: Table S1), allowing a maximum of three  
42  
43 340 mismatches per primer sequence. Subsequently, 2% of the positions in each variable region  
44  
45 341 were randomly mutated to create nucleotide diversity, using a custom python script  
46  
47 342 (<https://github.com/Finn-Lab/Tax-Benchmarking>). Sequencing reads were simulated from  
48  
49

50  
51 343 these amplicon sequences in duplicate using the MiSeq v3 error profile with ART (ART,  
52  
53  
54  
55  
56  
57  
58  
59  
60  
61  
62  
63  
64  
65

1 344 RRID:SCR\_006538) [38], generating ~ 10 000 and ~ 200 000 paired-end reads of 250 bp per  
2 345 region to have samples representing both low and high levels of sequencing depth.  
3

4  
5 346

## 6 7 347 **Sequence classification**

8  
9 348 Initial pre-processing and quality control was performed following the mothur standard  
10 349 operating procedure (SOP) [24], accessed on November 2017. Briefly, the *make.contigs*  
11 350 command was used to align, filter and merge the paired-end reads into contigs. Subsequently,  
12 351 we used the *screen.seqs* command to filter out any sequences with ambiguous base calls. This  
13 352 final set of quality controlled sequences was then assigned into taxonomic lineages with  
14 353 MAPseq v1.2.2 [17], mothur v1.39.5 (mothur , RRID:SCR\_011947)[9], QIIME 1.9.1  
15 354 (QIIME, RRID:SCR\_008249)[10], and QIIME 2 v2017.11 (<https://qiime2.org/>). For each  
16 355 software, we evaluated the settings and databases most frequently used and recommended for  
17 356 optimal taxonomic classification (Additional file: Fig. S3). With MAPseq, we tested the  
18 357 default NCBI database (mapref 2.2), as well as Greengenes 13\_8 and the SILVA 128  
19 358 database re-mapped to an eight-level taxonomy (available in  
20 359 [ftp://ftp.ebi.ac.uk/pub/databases/metagenomics/mapseq\\_silva128](ftp://ftp.ebi.ac.uk/pub/databases/metagenomics/mapseq_silva128)). Each set of reference  
21 360 sequences was analysed following the internal clustering by MAPseq. Options *-tophits 80*  
22 361 and *-topotus 40* were used in combination with the *-outfmt simple* option. For QIIME 1.9.1,  
23 362 the *pick\_closed\_reference\_otus.py* script was used with the default Greengenes database  
24 363 (13\_8) and with SILVA 128, both clustered at 97% identity. Taxonomic assignment with  
25 364 mothur was carried out according to the MiSeq SOP [24], excluding the chimera detection  
26 365 and removal steps, using the available pre-formatted SILVA 128 database for alignment and  
27 366 either the RDP version 16 or SILVA 128 for sequence classification. We did not use the  
28 367 Greengenes alignment database as per the mothur SOP [39]. Lastly, for QIIME 2 we first  
29 368 dereplicated the query sequences using the *vsearch dereplicate-sequences* function and then  
30  
31  
32  
33  
34  
35  
36  
37  
38  
39  
40  
41  
42  
43  
44  
45  
46  
47  
48  
49  
50  
51  
52  
53  
54  
55  
56  
57  
58  
59  
60  
61  
62  
63  
64  
65

369 assigned them to the Greengenes (13\_8) or SILVA 128 (99% identity clusters) databases  
370 using the *feature-classifier classify-sklearn* function [18].

371

## 372 **Analysis and visualization**

373 TSV and BIOM files were generated from the MAPseq and QIIME 2 outputs and combined  
374 with the output BIOM files created by QIIME and *mothur* (*make.biom* command). Taxonomy  
375 names obtained from each individual reference database were normalized so that each genus  
376 and family would be assigned to the same lineage. Results were visualized and analysed with  
377 the *phyloseq* (*phyloseq*, RRID:SCR\_013080)[40] and *vegan* R packages (*vegan*,  
378 RRID:SCR\_011950). The recall rate (sensitivity) for each tool and database was estimated as  
379 the percentage of sequences assigned to the expected taxa for each biome, while precision  
380 (specificity) was calculated as the fraction of sequences from these predicted taxa out of all  
381 those from the taxa observed. Finally, the F-score was calculated as follows:

382

$$383 \quad F\text{-score} = 2 \times \frac{\text{precision} \times \text{recall}}{\text{precision} + \text{recall}}$$

384

385 Distance estimates were calculated with either the Bray-Curtis or Jaccard dissimilarity  
386 indices after grouping the taxonomic lineages at the genus level. Principal coordinate analysis  
387 (PCoA) were performed with the Bray-Curtis distance method. Dissimilarity scores (DS) on  
388 the relative abundance (*rel.ab*) of each expected genus were calculated as:

389

$$390 \quad DS = \frac{|\text{rel. ab. (Observed)} - \text{rel. ab. (Expected)}|}{\text{rel. ab. (Expected)}}$$

391

392 Memory usage and CPU time was estimated as the total amount required for the processing  
393 and assignment of all combined sequences against the SILVA 128 database (clustered at  
394 99%), following the protocols described above.

395

## 396 **Availability of supporting source code and requirements**

397 Project name: Taxonomy benchmarking

398 Project home page: <https://github.com/Finn-Lab/Tax-Benchmarking>

399 Operating system: Platform independent

400 Programming languages: Python 2.7, R 3.4.1

401 Other requirements: BioPython module, R libraries (ggplot2, phyloseq, vegan, scales, grid,

402 ape, RColorBrewer, data.table)

403 License: MIT

404

## 405 **Availability of supporting data**

406 The datasets supporting the conclusions of this article are available in the GigaDB repository

407 [41].

408

## 409 **Declarations**

### 410 **List of abbreviations**

411 CPU: Central Processing Unit

412 DS: Dissimilarity score

413 ENA: European Nucleotide Archive

414 GG: Greengenes

415 OTU: Operational Taxonomic Unit

1  
2  
3  
4  
5  
6  
7  
8  
9  
10  
11  
12  
13  
14  
15  
16  
17  
18  
19  
20  
21  
22  
23  
24  
25  
26  
27  
28  
29  
30  
31  
32  
33  
34  
35  
36  
37  
38  
39  
40  
41  
42  
43  
44  
45  
46  
47  
48  
49  
50  
51  
52  
53  
54  
55  
56  
57  
58  
59  
60  
61  
62  
63  
64  
65

416 PCoA: Principal coordinates analysis

417 RDP: Ribosomal Database Project

418 rRNA : ribosomal rRNA

419

**420 Ethics approval and consent to participate**

421 Not applicable

422

**423 Consent for publication**

424 Not applicable

425

**426 Competing interests**

427 The authors declare that they have no competing interests

428

**429 Funding**

430 European Molecular Biology Laboratory (EMBL); European Commission within the

431 Research Infrastructures Programme of Horizon 2020 [676559] (ELIXIR-EXCELERATE)

432

433

**434 Authors' contributions**

435 AA, ALM, AT and RDF performed the analyses. AA, ALM and RDF conceived the study

436 and wrote the manuscript. All authors have read and approved the final manuscript.

437

**438 Acknowledgements**

439 We thank João Matias Rodrigues for providing useful comments on the utility of MAPseq in

440 relation to the benchmarking.



441 **Figure legends**

442 **Figure 1.** Level of recall at the genus level, represented as taxa relative abundances, obtained  
443 with each analysis pipeline for the three different biomes (human gut, ocean and soil). The  
444 number of genera correctly identified by each pipeline is indicated above the graph.

445  
446 **Figure 2.** (A) Recall, precision and F-score estimates at the genus level for each tool and  
447 database tested. (B) F-scores calculated for some of the most commonly tested sub-regions of  
448 the 16S rRNA gene: V1-V2, V3-V4, V4 and V4-V5.

449  
450 **Figure 3.** Computational cost of each taxonomy assignment tool, estimated as the total  
451 memory usage (A) and CPU time (B) required for the processing and classification of ~ 3  
452 million sequences against the SILVA 128 database. Error bars denote standard deviation  
453 across the three biomes tested (human gut, ocean and soil).

454  
455 **Figure 4.** Dissimilarity scores (DS) calculated for each genus included in the simulated  
456 datasets. Lower (brighter) values indicate a closer prediction to the true composition of the  
457 original sample. The black outline indicates the overall best scoring analysis pipeline for each  
458 environment. Taxa are ordered by decreasing abundance from left to right, based on their  
459 composition in the simulated sample.

460  
461 **Figure 5.** Principal coordinates analysis (PCoA) between all samples analysed in relation to  
462 the true, expected dataset, using the Bray-Curtis distance method.

463

1  
2  
3  
4  
5  
6  
7  
8  
9  
10  
11  
12  
13  
14  
15  
16  
17  
18  
19  
20  
21  
22  
23  
24  
25  
26  
27  
28  
29  
30  
31  
32  
33  
34  
35  
36  
37  
38  
39  
40  
41  
42  
43  
44  
45  
46  
47  
48  
49  
50  
51  
52  
53  
54  
55  
56  
57  
58  
59  
60  
61  
62  
63  
64  
65

464 **Figure S1.** Composition of the synthetic communities per selected environment. Samples  
465 A100 and B100 are randomly generated sets of 100 species, while A500 and B500 were  
466 simulated from 500 different species.

467  
468 **Figure S2.** Percentage of sequences retrieved from the Greengenes, NCBI, RDP and SILVA  
469 databases with an *in silico* PCR targeting different 16S rRNA gene sub-regions.

470

471 **Figure S3.** Tools and databases benchmarked in our study. We tested at least two databases  
472 per software tool. The reference databases used were either readily supported by the specific  
473 tool and/or recommended by their developers. SILVA was compared across all tools;  
474 MAPseq was specifically assessed with the NCBI database, its default reference; mothur was  
475 not paired with Greengenes due to its poor-quality alignment [39] and was analysed with  
476 RDP instead.

477

478 **Figure S4.** Number of genera misassigned in each analysis pipeline and their overall relative  
479 abundance. Names and abundance values of each misclassified taxon are included as  
480 additional files (Additional files: Tables S5, S6 and S7).

481

482 **Figure S5.** Recall, precision and F-score estimates at the family level for each tool and  
483 database tested.

484 **References**

- 1  
2  
3 485 1. Forbes JD, Van Domselaar G, Bernstein CN. The gut microbiota in immune-mediated  
4  
5 486 inflammatory diseases. *Front. Microbiol.* 2016;7:1081.  
6
- 7  
8 487 2. Duvallet C, Gibbons SM, Gurry T, Irizarry RA, Alm EJ. Meta-analysis of gut microbiome  
9  
10 488 studies identifies disease-specific and shared responses. *Nat. Commun.* 2017;8:1784.  
11
- 12  
13 489 3. Turnbaugh PJ, Ley RE, Mahowald MA, Magrini V, Mardis ER, Gordon JI. An obesity-  
14  
15 490 associated gut microbiome with increased capacity for energy harvest. *Nature.*  
16  
17 491 2006;444:1027–31.  
18
- 19  
20 492 4. Thompson LR, Sanders JG, McDonald D, Amir A, Ladau J, Locey KJ, et al. A communal  
21  
22 493 catalogue reveals Earth’s multiscale microbial diversity. *Nature.* 2017;551:457–63.  
23
- 24  
25 494 5. Yilmaz P, Yarza P, Rapp JZ, Glöckner FO. Expanding the world of marine bacterial and  
26  
27 495 archaeal clades. *Front. Microbiol.* 2016;6:1524.  
28
- 29  
30 496 6. Fierer N. Embracing the unknown: disentangling the complexities of the soil microbiome.  
31  
32 497 *Nat. Rev. Microbiol.* 2017;15:579–90.  
33
- 34  
35 498 7. Mitchell AL, Scheremetjew M, Denise H, Potter S, Tarkowska A, Qureshi M, et al. EBI  
36  
37 499 Metagenomics in 2017: enriching the analysis of microbial communities, from sequence  
38  
39 500 reads to assemblies. *Nucleic Acids Res.* 2017;46:D726–35.  
40
- 41  
42 501 8. Pace NR, Stahl DA, Lane DJ, Olsen GJ. The analysis of natural microbial populations by  
43  
44 502 ribosomal RNA sequences. *Adv. Microb. Ecol.* 1986. p. 1–55.  
45
- 46  
47 503 9. Schloss PD, Westcott SL, Ryabin T, Hall JR, Hartmann M, Hollister EB, et al. Introducing  
48  
49 504 mothur: open-source, platform-independent, community-supported software for describing  
50  
51 505 and comparing microbial communities. *Appl. Environ. Microbiol.* 2009;75:7537–41.  
52
- 53  
54 506 10. Caporaso JG, Kuczynski J, Stombaugh J, Bittinger K, Bushman FD, Costello EK, et al.  
55  
56 507 QIIME allows analysis of high-throughput community sequencing data. *Nat. Methods.*  
57  
58 508 2010;7:335–6.  
59  
60  
61  
62  
63  
64  
65

- 1  
2  
3  
4  
5  
6  
7  
8  
9  
10  
11  
12  
13  
14  
15  
16  
17  
18  
19  
20  
21  
22  
23  
24  
25  
26  
27  
28  
29  
30  
31  
32  
33  
34  
35  
36  
37  
38  
39  
40  
41  
42  
43  
44  
45  
46  
47  
48  
49  
50  
51  
52  
53  
54  
55  
56  
57  
58  
59  
60  
61  
62  
63  
64  
65
- 509 11. McDonald D, Price MN, Goodrich J, Nawrocki EP, DeSantis TZ, Probst A, et al. An  
510 improved Greengenes taxonomy with explicit ranks for ecological and evolutionary analyses  
511 of bacteria and archaea. *ISME J.* 2012;6:610–618.
  - 512 12. Federhen S. The NCBI Taxonomy database. *Nucleic Acids Res.* 2012;40:D136–43.
  - 513 13. Cole JR, Wang Q, Fish JA, Chai B, McGarrell DM, Sun Y, et al. Ribosomal Database  
514 Project: data and tools for high throughput rRNA analysis. *Nucleic Acids Res.*  
515 2014;42:D633–42.
  - 516 14. Yilmaz P, Parfrey LW, Yarza P, Gerken J, Pruesse E, Quast C, et al. The SILVA and  
517 “All-species Living Tree Project (LTP)” taxonomic frameworks. *Nucleic Acids Res.*  
518 2014;42:D643–8.
  - 519 15. Edgar RC. Search and clustering orders of magnitude faster than BLAST. *Bioinformatics.*  
520 2010;26:2460–1.
  - 521 16. Wang Q, Garrity GM, Tiedje JM, Cole JR. Naive Bayesian classifier for rapid assignment  
522 of rRNA sequences into the new bacterial taxonomy. *Appl. Environ. Microbiol.*  
523 2007;73:5261–7.
  - 524 17. Matias Rodrigues JF, Schmidt TSB, Tackmann J, von Mering C. MAPseq: highly  
525 efficient k-mer search with confidence estimates, for rRNA sequence analysis.  
526 *Bioinformatics.* 2017;33:3808–10.
  - 527 18. Bokulich NA, Kaehler BD, Rideout JR, Dillon M, Bolyen E, Knight R, et al. Optimizing  
528 taxonomic classification of marker gene amplicon sequences. *PeerJ (preprint).* 2018;
  - 529 19. Sczyrba A, Hofmann P, Belmann P, Koslicki D, Janssen S, Dröge J, et al. Critical  
530 Assessment of Metagenome Interpretation—a benchmark of metagenomics software. *Nat.*  
531 *Methods.* 2017;14:1063–71.
  - 532 20. Golob JL, Margolis E, Hoffman NG, Fredricks DN. Evaluating the accuracy of amplicon-  
533 based microbiome computational pipelines on simulated human gut microbial communities.

534 BMC Bioinformatics. 2017;18:283.

1  
2 535 21. Lindgreen S, Adair KL, Gardner PP. An evaluation of the accuracy and speed of  
3  
4  
5 536 metagenome analysis tools. *Sci. Rep.* 2015;6:19233.

6  
7 537 22. Fosso B, Santamaria M, Marzano M, Alonso-Aleman D, Valiente G, Donvito G, et al.  
8  
9  
10 538 BioMaS: a modular pipeline for Bioinformatic analysis of Metagenomic AmpliconS. *BMC*  
11  
12 539 *Bioinformatics.* 2015;16:203.

13  
14 540 23. Yang B, Wang Y, Qian P-Y. Sensitivity and correlation of hypervariable regions in 16S  
15  
16  
17 541 rRNA genes in phylogenetic analysis. *BMC Bioinformatics.* 2016;17:135.

18  
19 542 24. Kozich JJ, Westcott SL, Baxter NT, Highlander SK, Schloss PD. Development of a dual-  
20  
21  
22 543 index sequencing strategy and curation pipeline for analyzing amplicon sequence data on the  
23  
24 544 MiSeq Illumina sequencing platform. *Appl. Environ. Microbiol.* 2013;79:5112–20.

25  
26 545 25. Klindworth A, Pruesse E, Schweer T, Peplies J, Quast C, Horn M, et al. Evaluation of  
27  
28  
29 546 general 16S ribosomal RNA gene PCR primers for classical and next-generation sequencing-  
30  
31  
32 547 based diversity studies. *Nucleic Acids Res.* 2012;41:e1.

33  
34 548 26. Walker AW, Martin JC, Scott P, Parkhill J, Flint HJ, Scott KP. 16S rRNA gene-based  
35  
36  
37 549 profiling of the human infant gut microbiota is strongly influenced by sample processing and  
38  
39 550 PCR primer choice. *Microbiome.* 2015;3:26.

40  
41 551 27. Comeau AM, Douglas GM, Langille MGI. Microbiome Helper: a custom and streamlined  
42  
43  
44 552 workflow for microbiome research. *mSystems.* 2017;2:e00127-16.

45  
46 553 28. Brooks JP, Edwards DJ, Harwich MD, Rivera MC, Fettweis JM, Serrano MG, et al. The  
47  
48  
49 554 truth about metagenomics: quantifying and counteracting bias in 16S rRNA studies. *BMC*  
50  
51 555 *Microbiol.* 2015;15:66.

52  
53 556 29. Schloss PD, Gevers D, Westcott SL. Reducing the effects of PCR amplification and  
54  
55  
56 557 sequencing artifacts on 16S rRNA-based studies. *PLOS One.* 2011;6.

57  
58 558 30. Quince C, Walker AW, Simpson JT, Loman NJ, Segata N. Shotgun metagenomics, from  
59  
60  
61  
62  
63  
64  
65

559 sampling to analysis. *Nat. Biotechnol.* 2017;35:833–44.

560 31. Shakya M, Quince C, Campbell JH, Yang ZK, Schadt CW, Podar M. Comparative  
561 metagenomic and rRNA microbial diversity characterization using archaeal and bacterial  
562 synthetic communities. *Environ. Microbiol.* 2013;15:1882–99.

563 32. Mahmoud KK, McNeely D, Elwood C, Koval SF. Design and performance of a 16S  
564 rRNA-targeted oligonucleotide probe for detection of members of the genus *Bdellovibrio* by  
565 fluorescence in situ hybridization. *Appl. Environ. Microbiol.* 2007;73:7488–93.

566 33. Turner S, Pryer K, Miao V, Palmer J. Investigating deep phylogenetic relationships  
567 among cyanobacteria and plastids by small subunit rRNA sequence analysis. *J. Eukaryot.*  
568 *Microbiol.* 1999;46:327–38.

569 34. Schloss PD, Jenior ML, Koumpouras CC, Westcott SL, Highlander SK. Sequencing 16S  
570 rRNA gene fragments using the PacBio SMRT DNA sequencing system. *PeerJ.*  
571 2016;4:e1869.

572 35. Balvočiute M, Huson DH. SILVA, RDP, Greengenes, NCBI and OTT — how do these  
573 taxonomies compare? *BMC Genomics.* 2017;18:114.

574 36. Keegan KP, Glass EM, Meyer F. MG-RAST, a metagenomics service for analysis of  
575 microbial community structure and function. *Methods Mol. Biol.* 2016. p. 207–33.

576 37. Pollock J, Glendinning L, Wisedchanwet T, Watson M. The madness of microbiome:  
577 attempting to find consensus “best practice” for 16S microbiome studies. *Environ.*  
578 *Microbiol.* 2018;84:e02627-17.

579 38. Huang W, Li L, Myers JR, Marth GT. ART: a next-generation sequencing read simulator.  
580 *Bioinformatics.* 2012;28:593–4.

581 39. Schloss P. mothur developer webpage. [https://www.mothur.org/wiki/Greengenes-](https://www.mothur.org/wiki/Greengenes-formatted_databases)  
582 [formatted\\_databases](https://www.mothur.org/wiki/Greengenes-formatted_databases). Accessed: November 2017.

583 40. McMurdie PJ, Holmes S, Watson M. phyloseq: an R package for reproducible interactive

584 analysis and graphics of microbiome census Data. PLOS One. 2013;8:e61217.

585 41. Almeida, A; Mitchell, A, L; Tarkowska, A; Finn, R, D (2018): Supporting data for

586 "Benchmarking taxonomic assignments based on 16S rRNA gene profiling of the microbiota

587 from commonly sampled environments" GigaScience Database.

588 <http://dx.doi.org/10.5524/100448>

589

15  
16  
17  
18  
19  
20  
21  
22  
23  
24  
25  
26  
27  
28  
29  
30  
31  
32  
33  
34  
35  
36  
37  
38  
39  
40  
41  
42  
43  
44  
45  
46  
47  
48  
49  
50  
51  
52  
53  
54  
55  
56  
57  
58  
59  
60  
61  
62  
63  
64  
65

**Table 1. Global metrics averaged across the analyses of simulated samples from human gut, ocean and soil.**

| Software | Database   | Family      |            | Genus       |            |                         |              |              |              |
|----------|------------|-------------|------------|-------------|------------|-------------------------|--------------|--------------|--------------|
|          |            | Recall      | Miscalled  | Recall      | Miscalled  | Sub-region <sup>1</sup> | Mean DS      | Bray-Curtis  | Jaccard      |
| MAPseq   | Greengenes | 88.3        | 2.4        | 58.9        | 2.4        | V3-V4                   | 0.434        | 0.282        | 0.440        |
| MAPseq   | NCBI       | 81.7        | 1.3        | 51.7        | 2.0        | V3-V4                   | 0.522        | 0.330        | 0.495        |
| MAPseq   | SILVA      | 67.2        | <b>0.7</b> | 46.5        | <b>1.0</b> | V3-V4                   | 0.482        | 0.373        | 0.540        |
| mothur   | RDP        | 85.4        | 3.2        | 50.5        | 5.0        | V3-V4                   | 0.419        | 0.356        | 0.523        |
| mothur   | SILVA      | 82.9        | 2.4        | 40.8        | 5.2        | V3-V4                   | 0.492        | 0.446        | 0.613        |
| QIIME 2  | Greengenes | 93.2        | 1.6        | <b>69.2</b> | 3.4        | V3-V4                   | 0.367        | <b>0.210</b> | <b>0.342</b> |
| QIIME 2  | SILVA      | <b>93.6</b> | 1.9        | 69.0        | 4.3        | V3-V4                   | <b>0.331</b> | 0.211        | 0.348        |
| QIIME    | Greengenes | 59.4        | 1.6        | 45.1        | 2.5        | V4                      | 0.585        | 0.394        | 0.564        |
| QIIME    | SILVA      | 66.4        | 2.1        | 57.5        | 6.5        | V4                      | 0.432        | 0.309        | 0.470        |

Values in bold denote the best score.

<sup>1</sup>Sub-region with the highest F-score, excluding V1-V2.

590



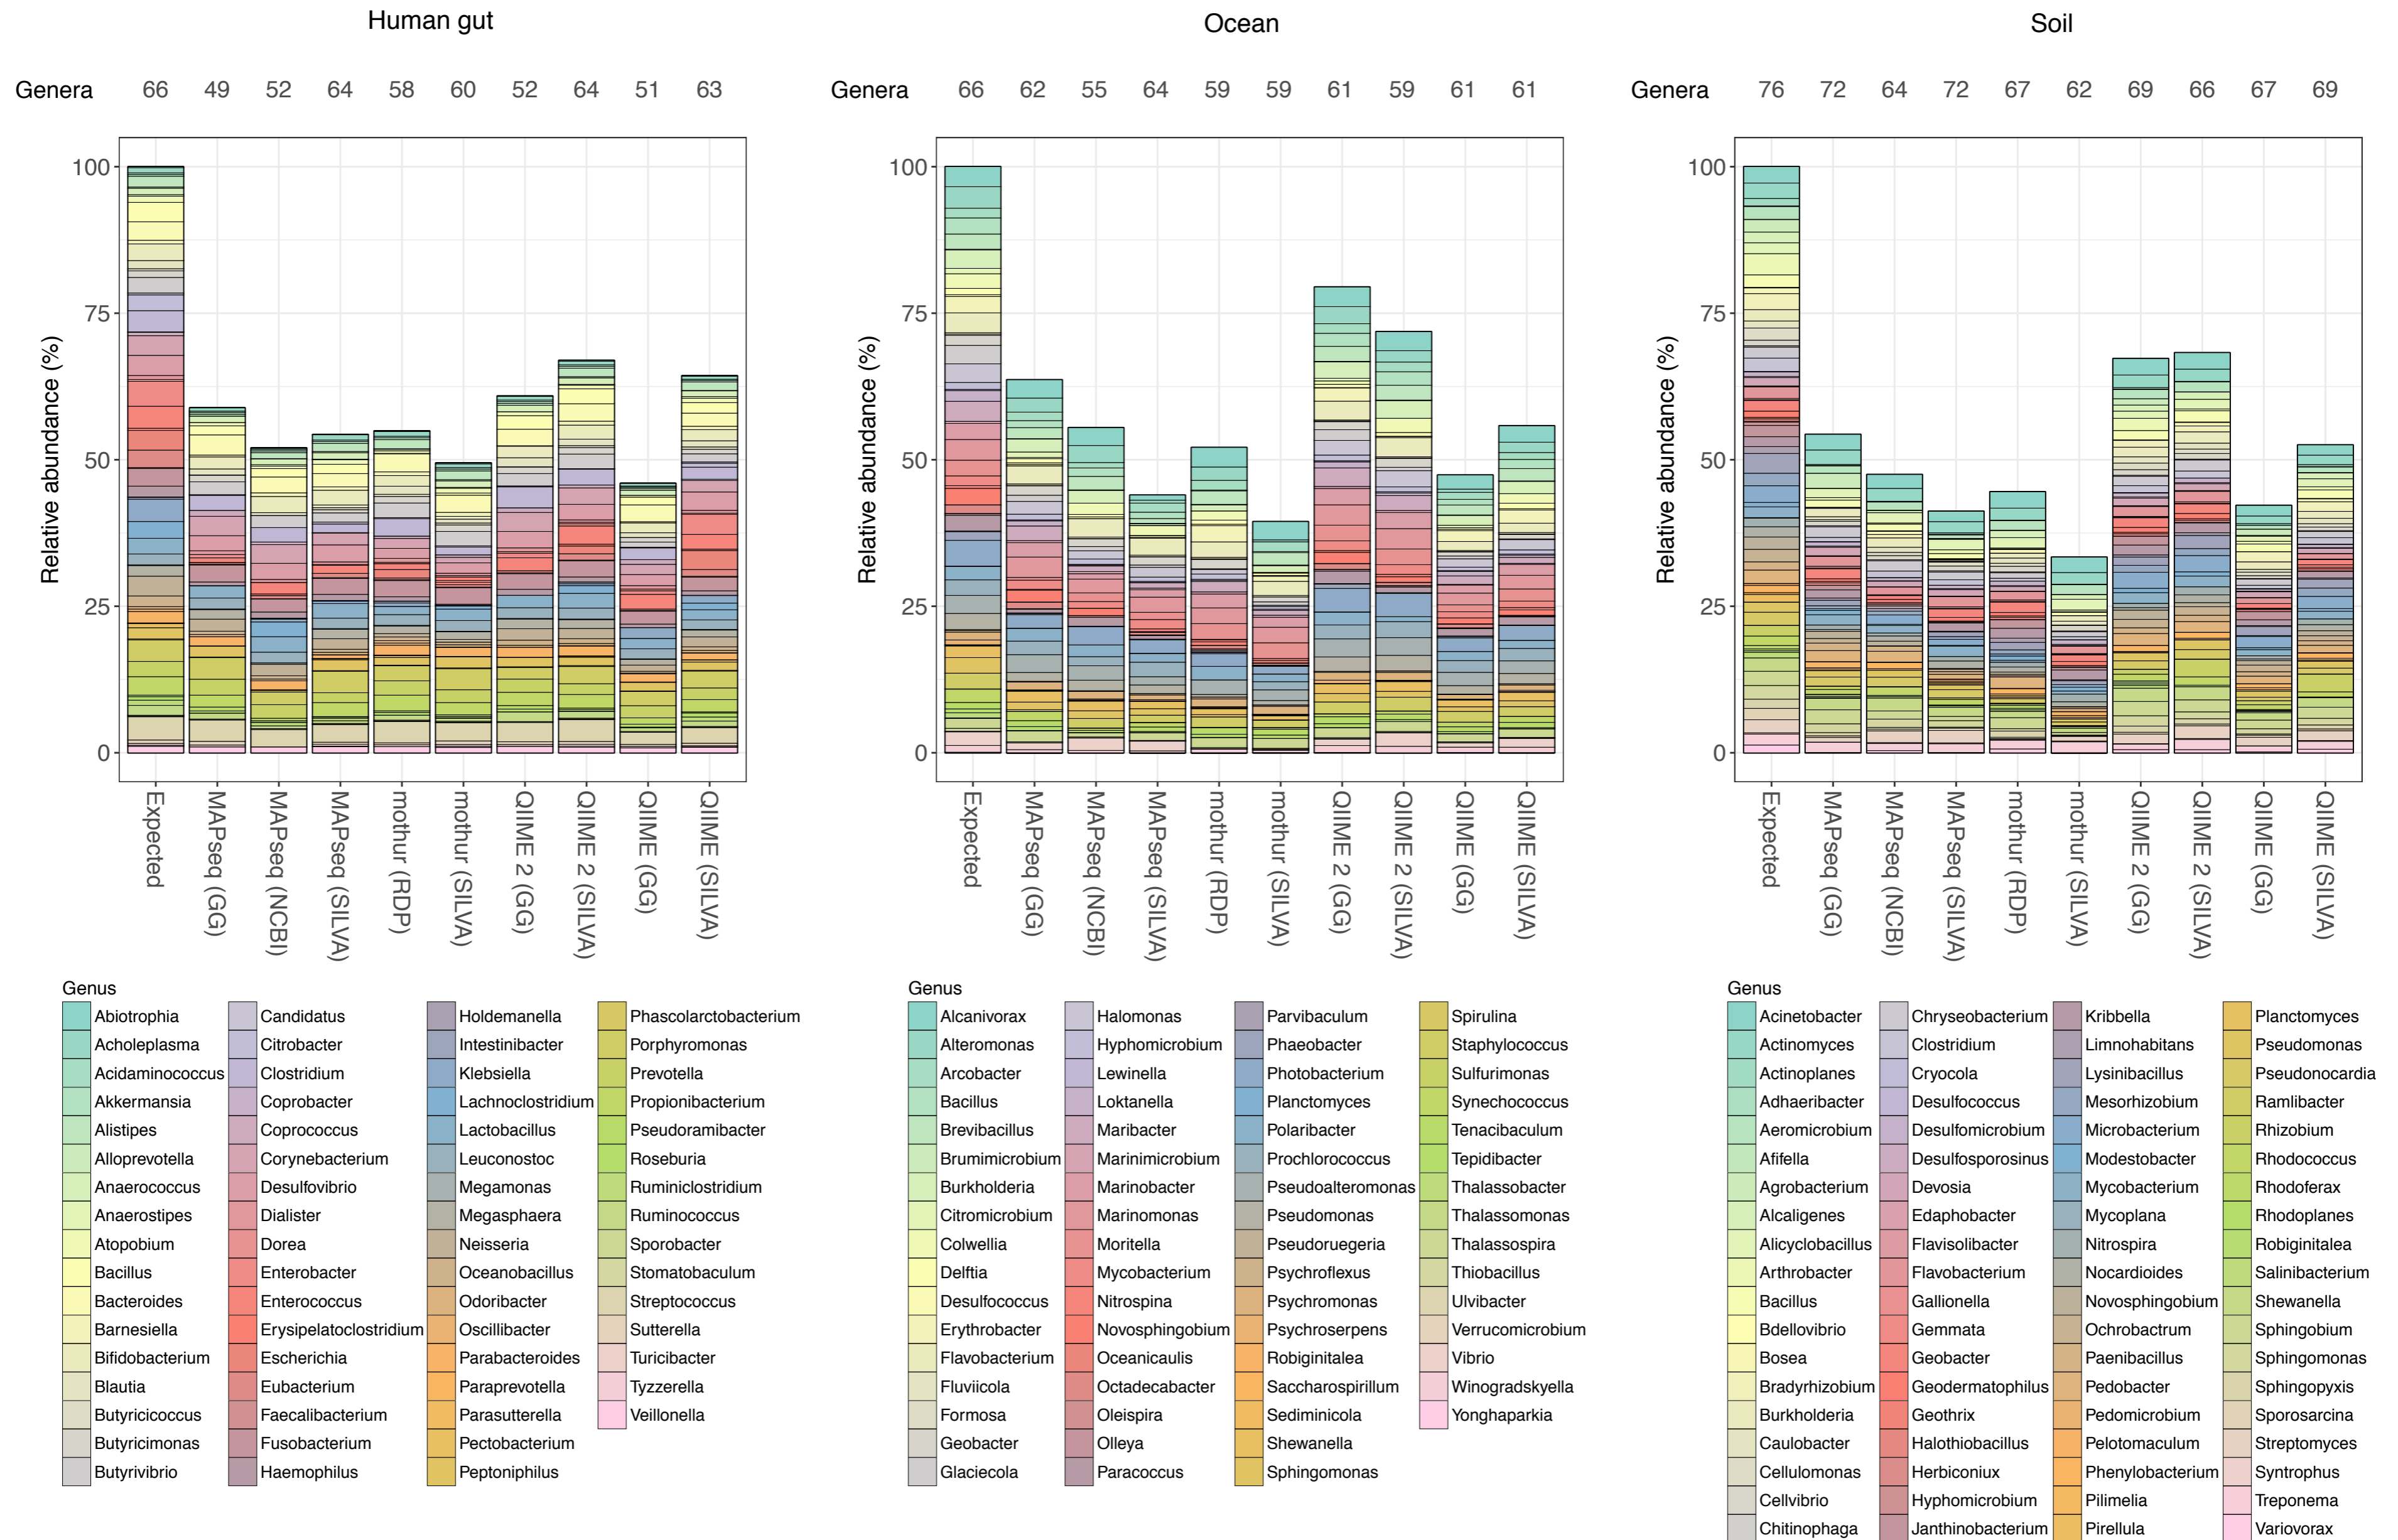

**A**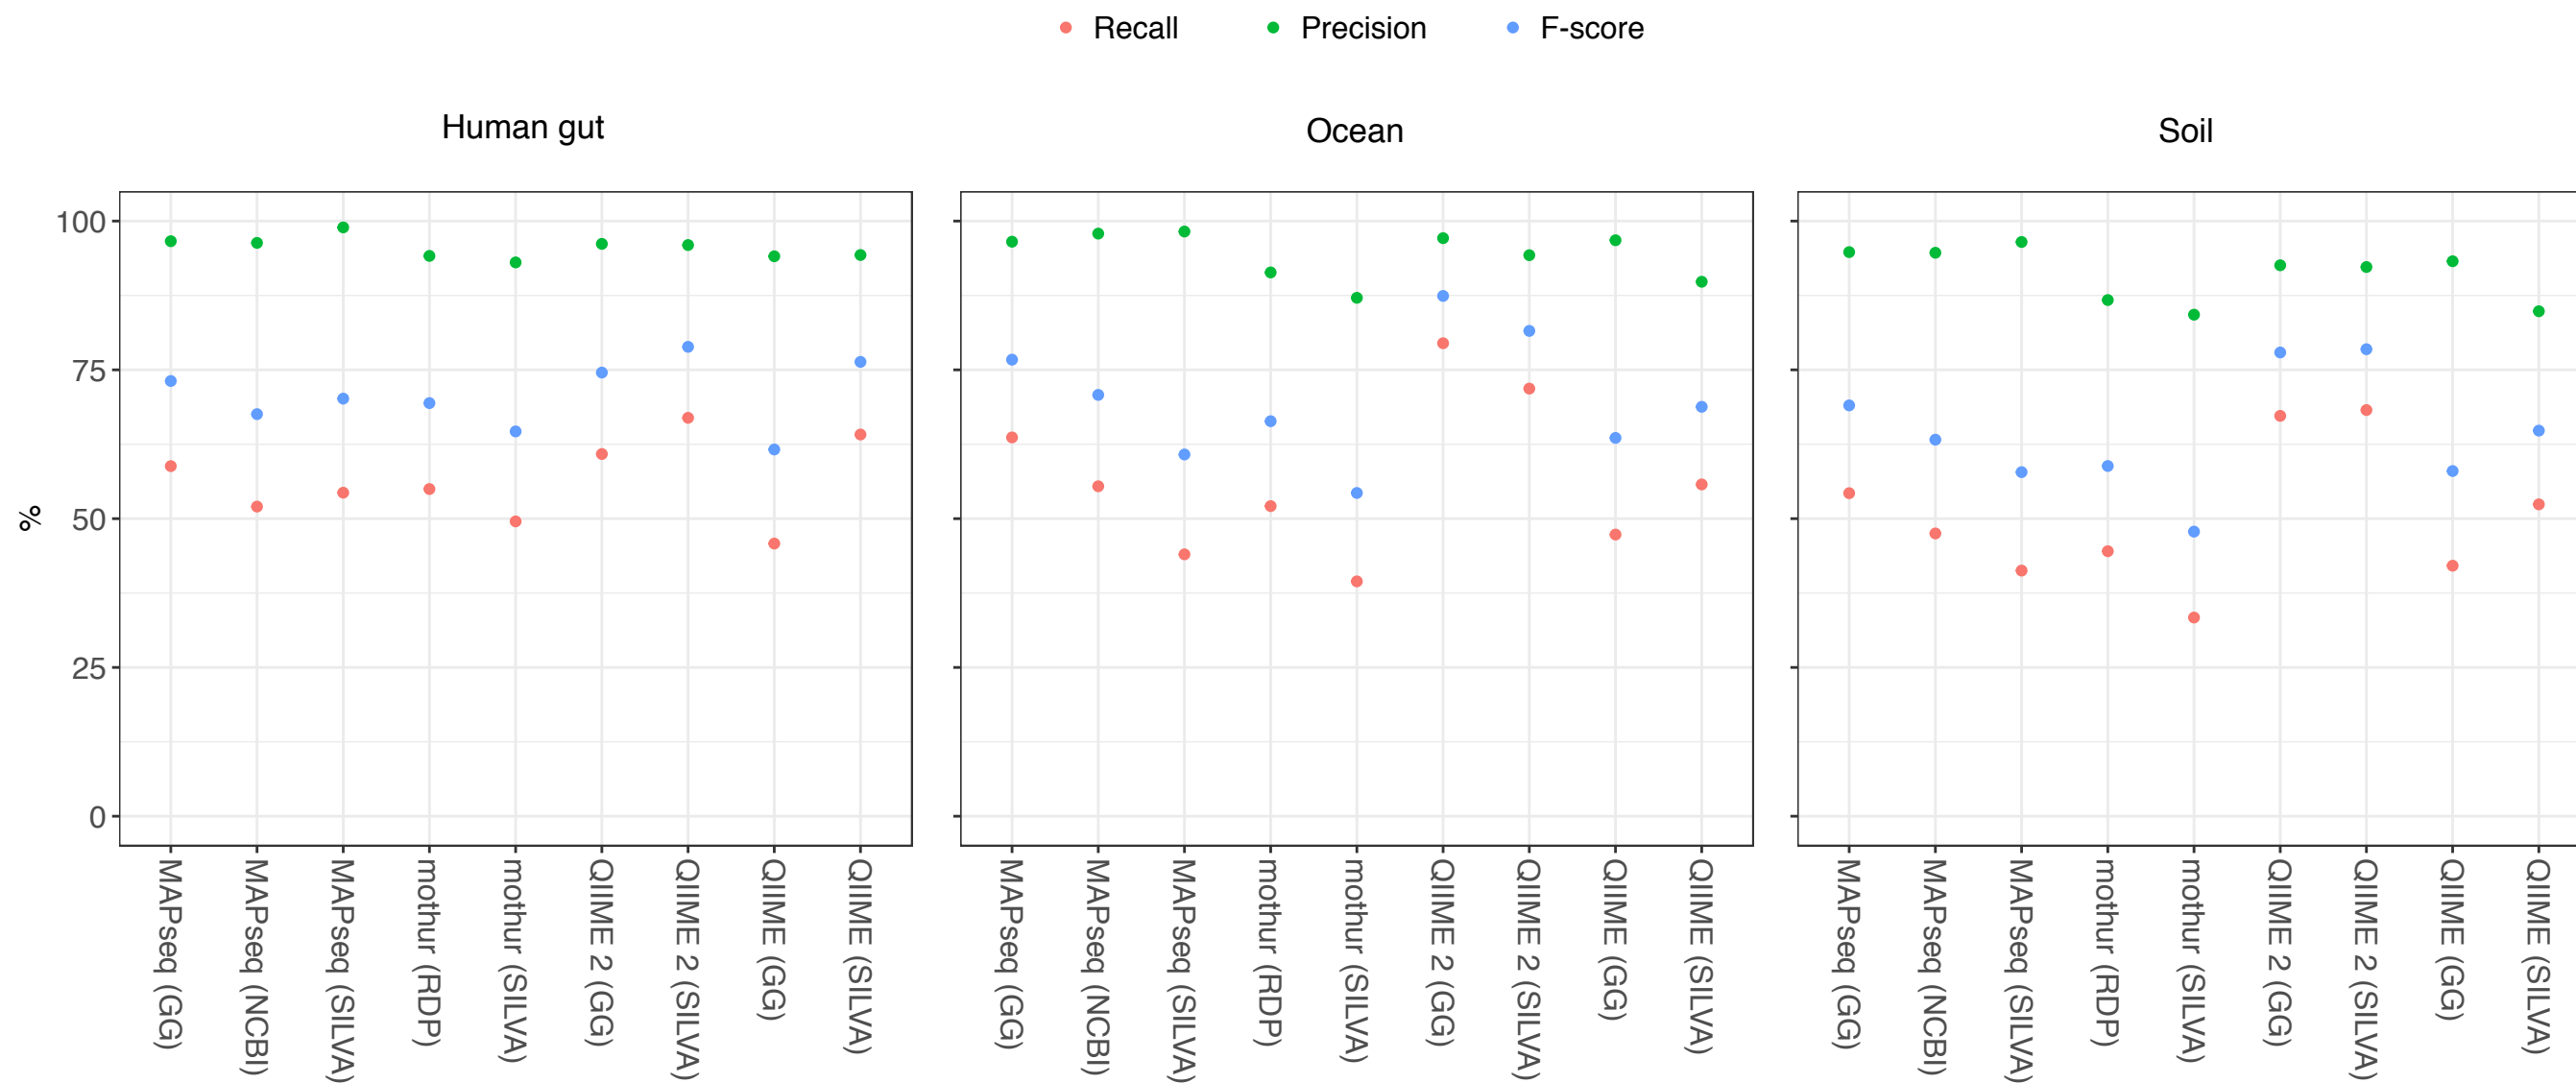**B**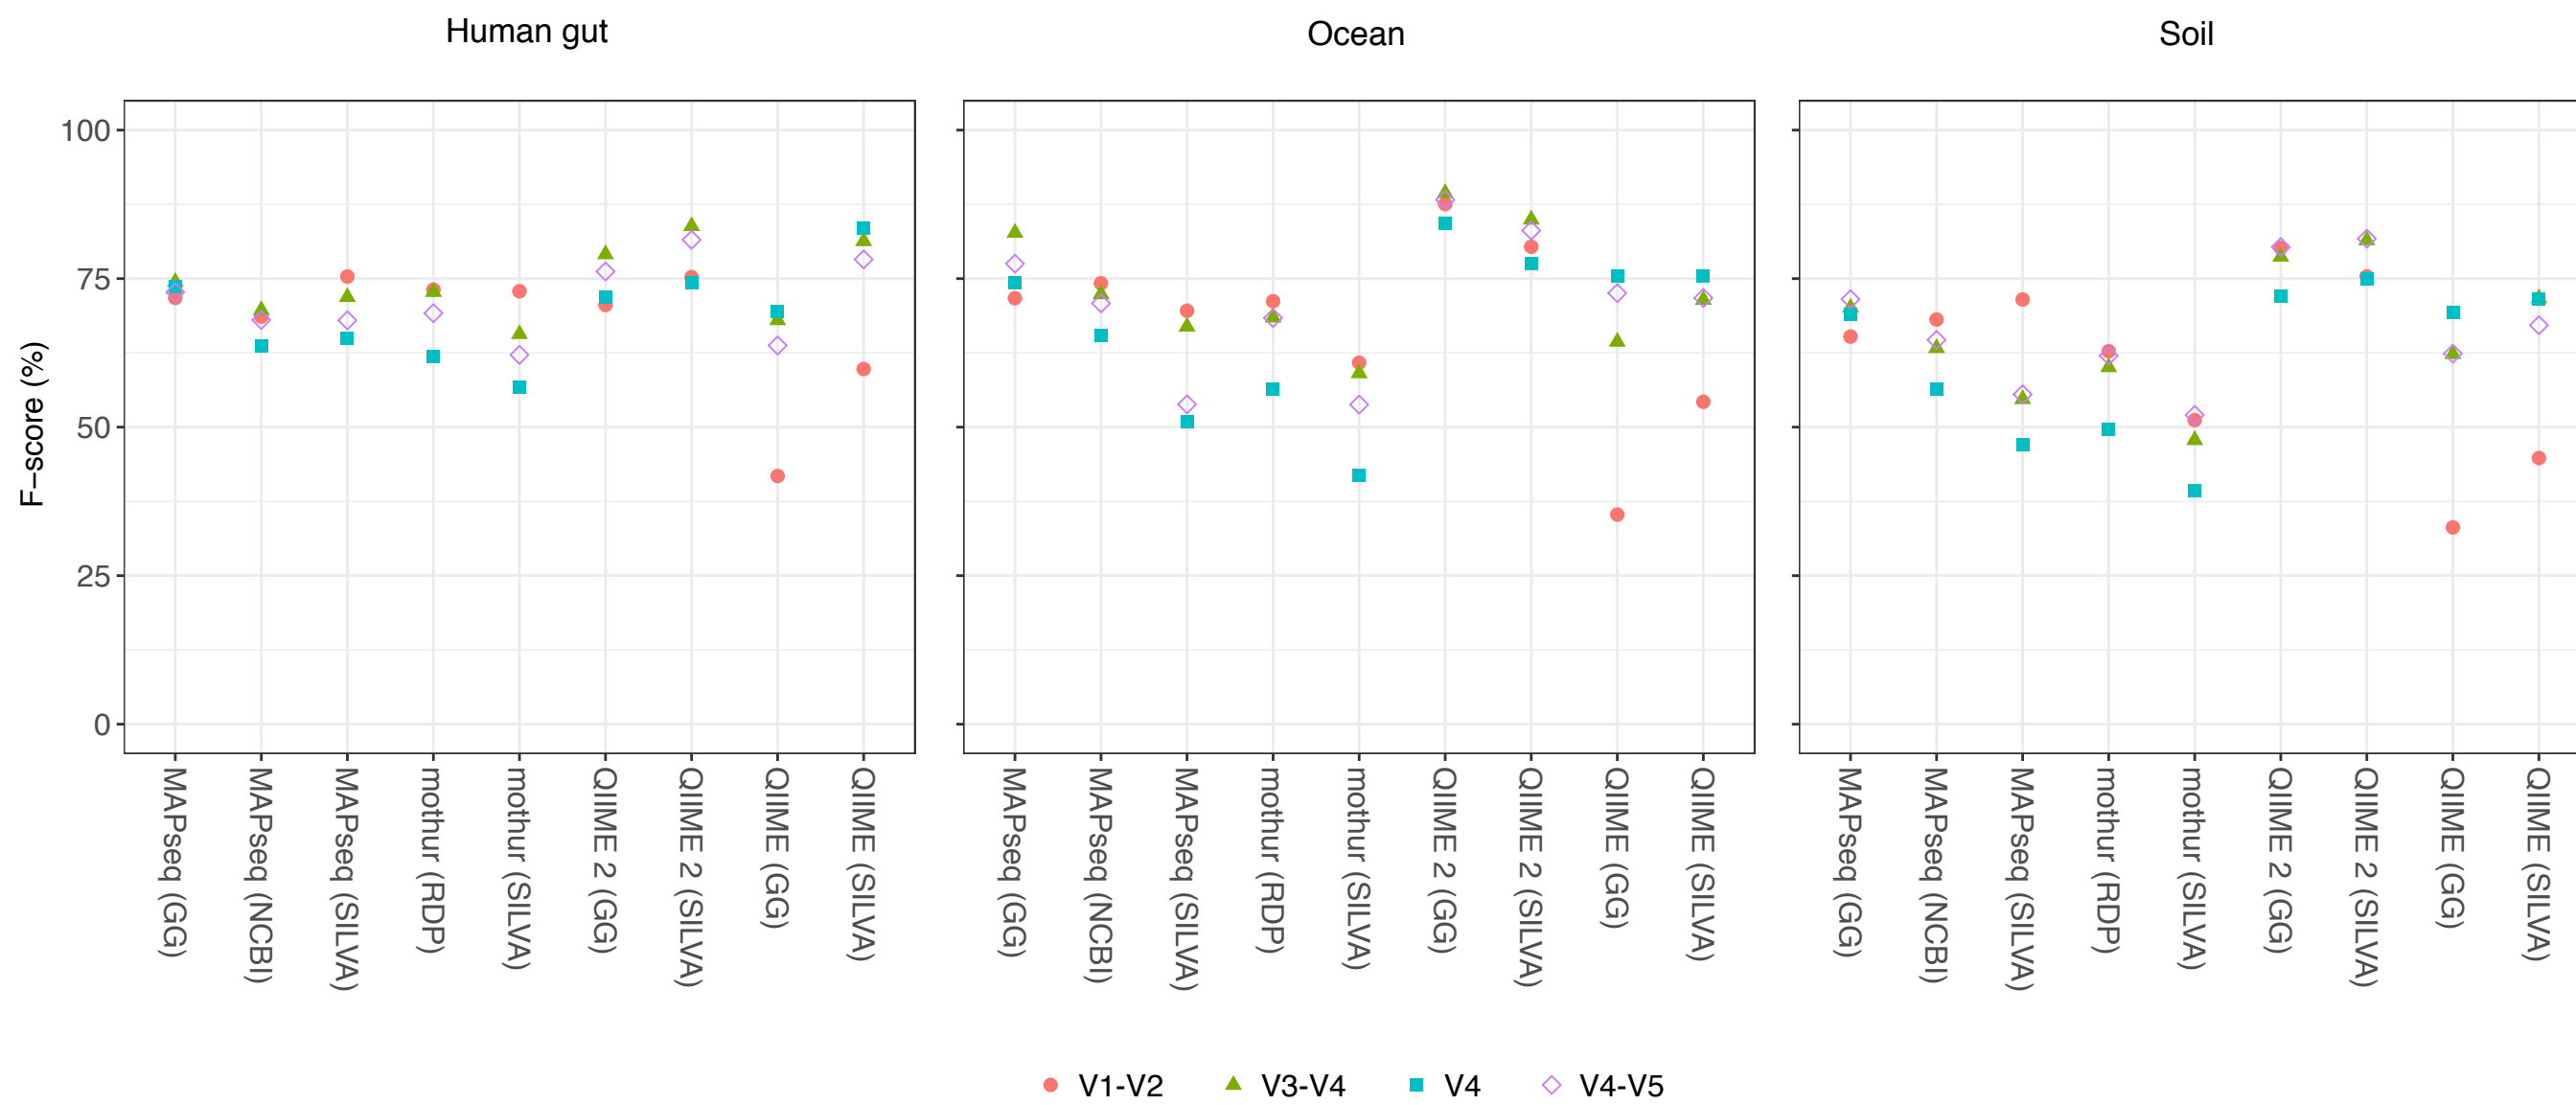

**A**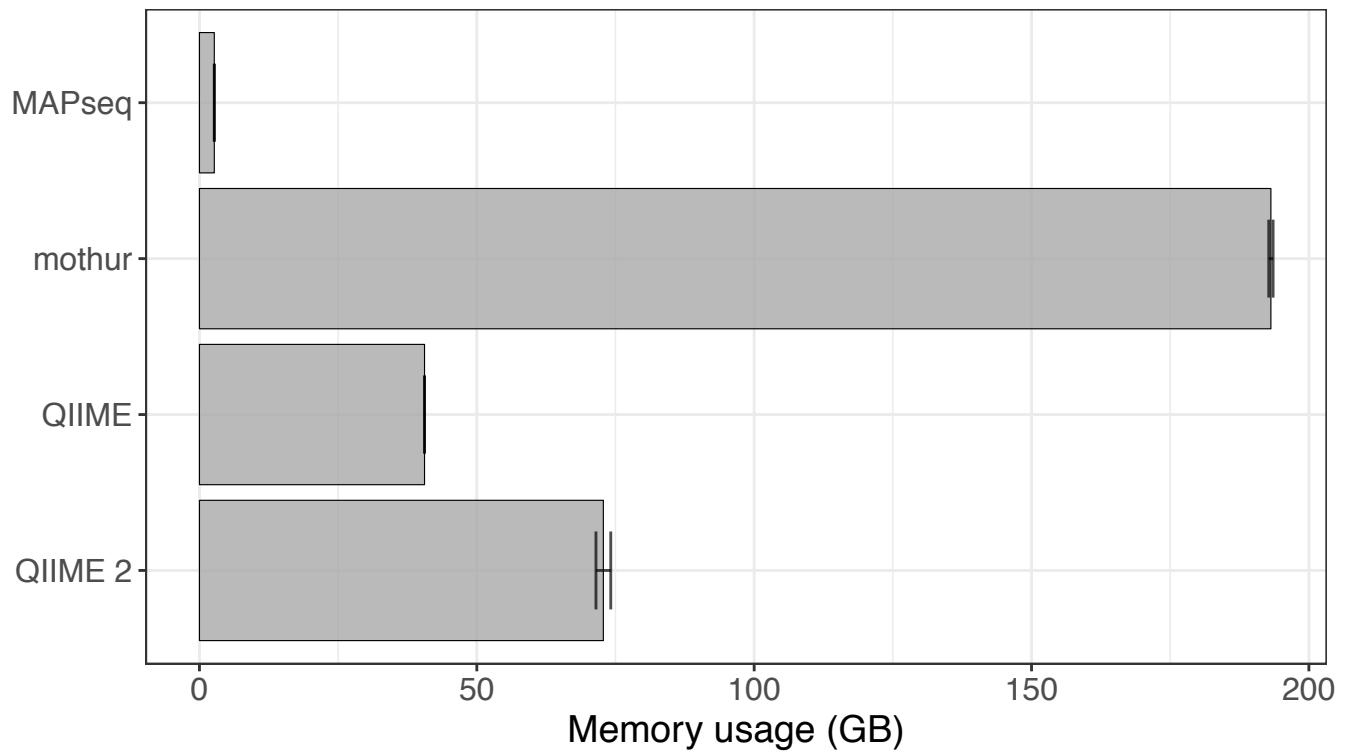**B**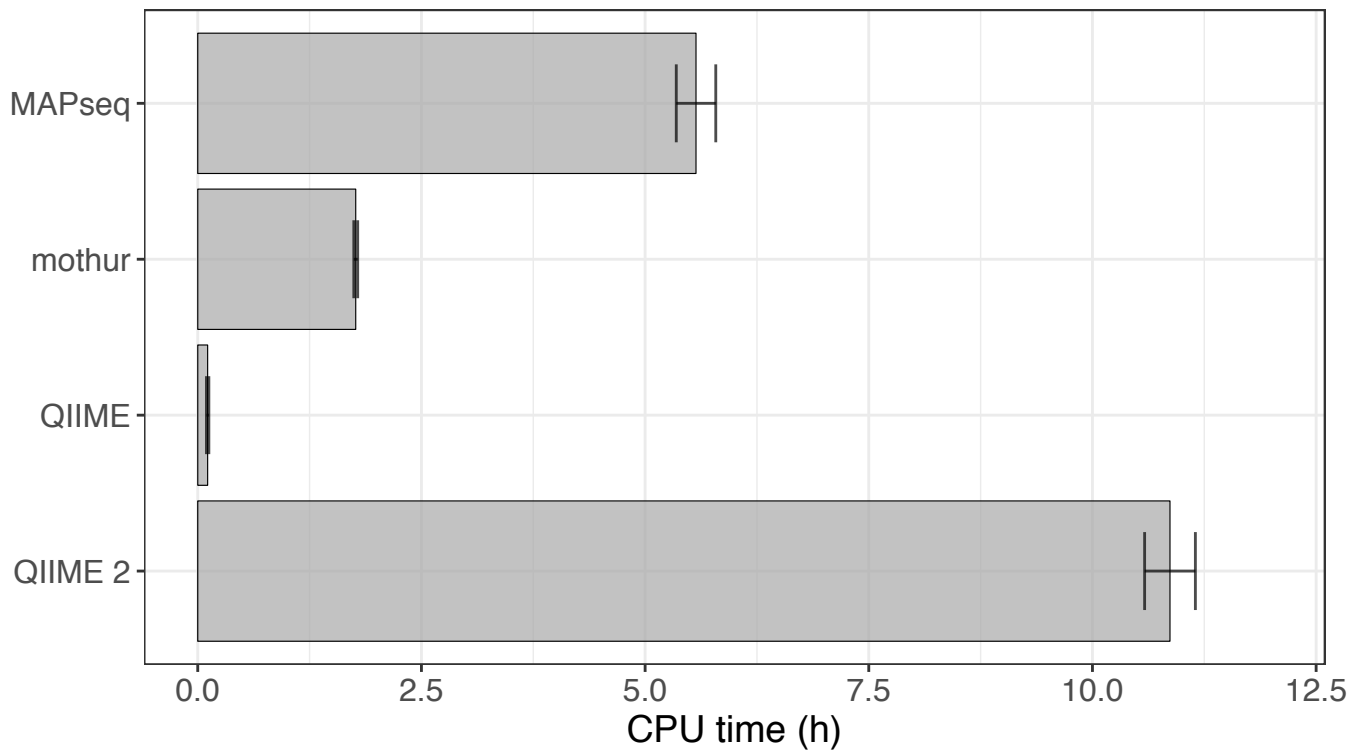

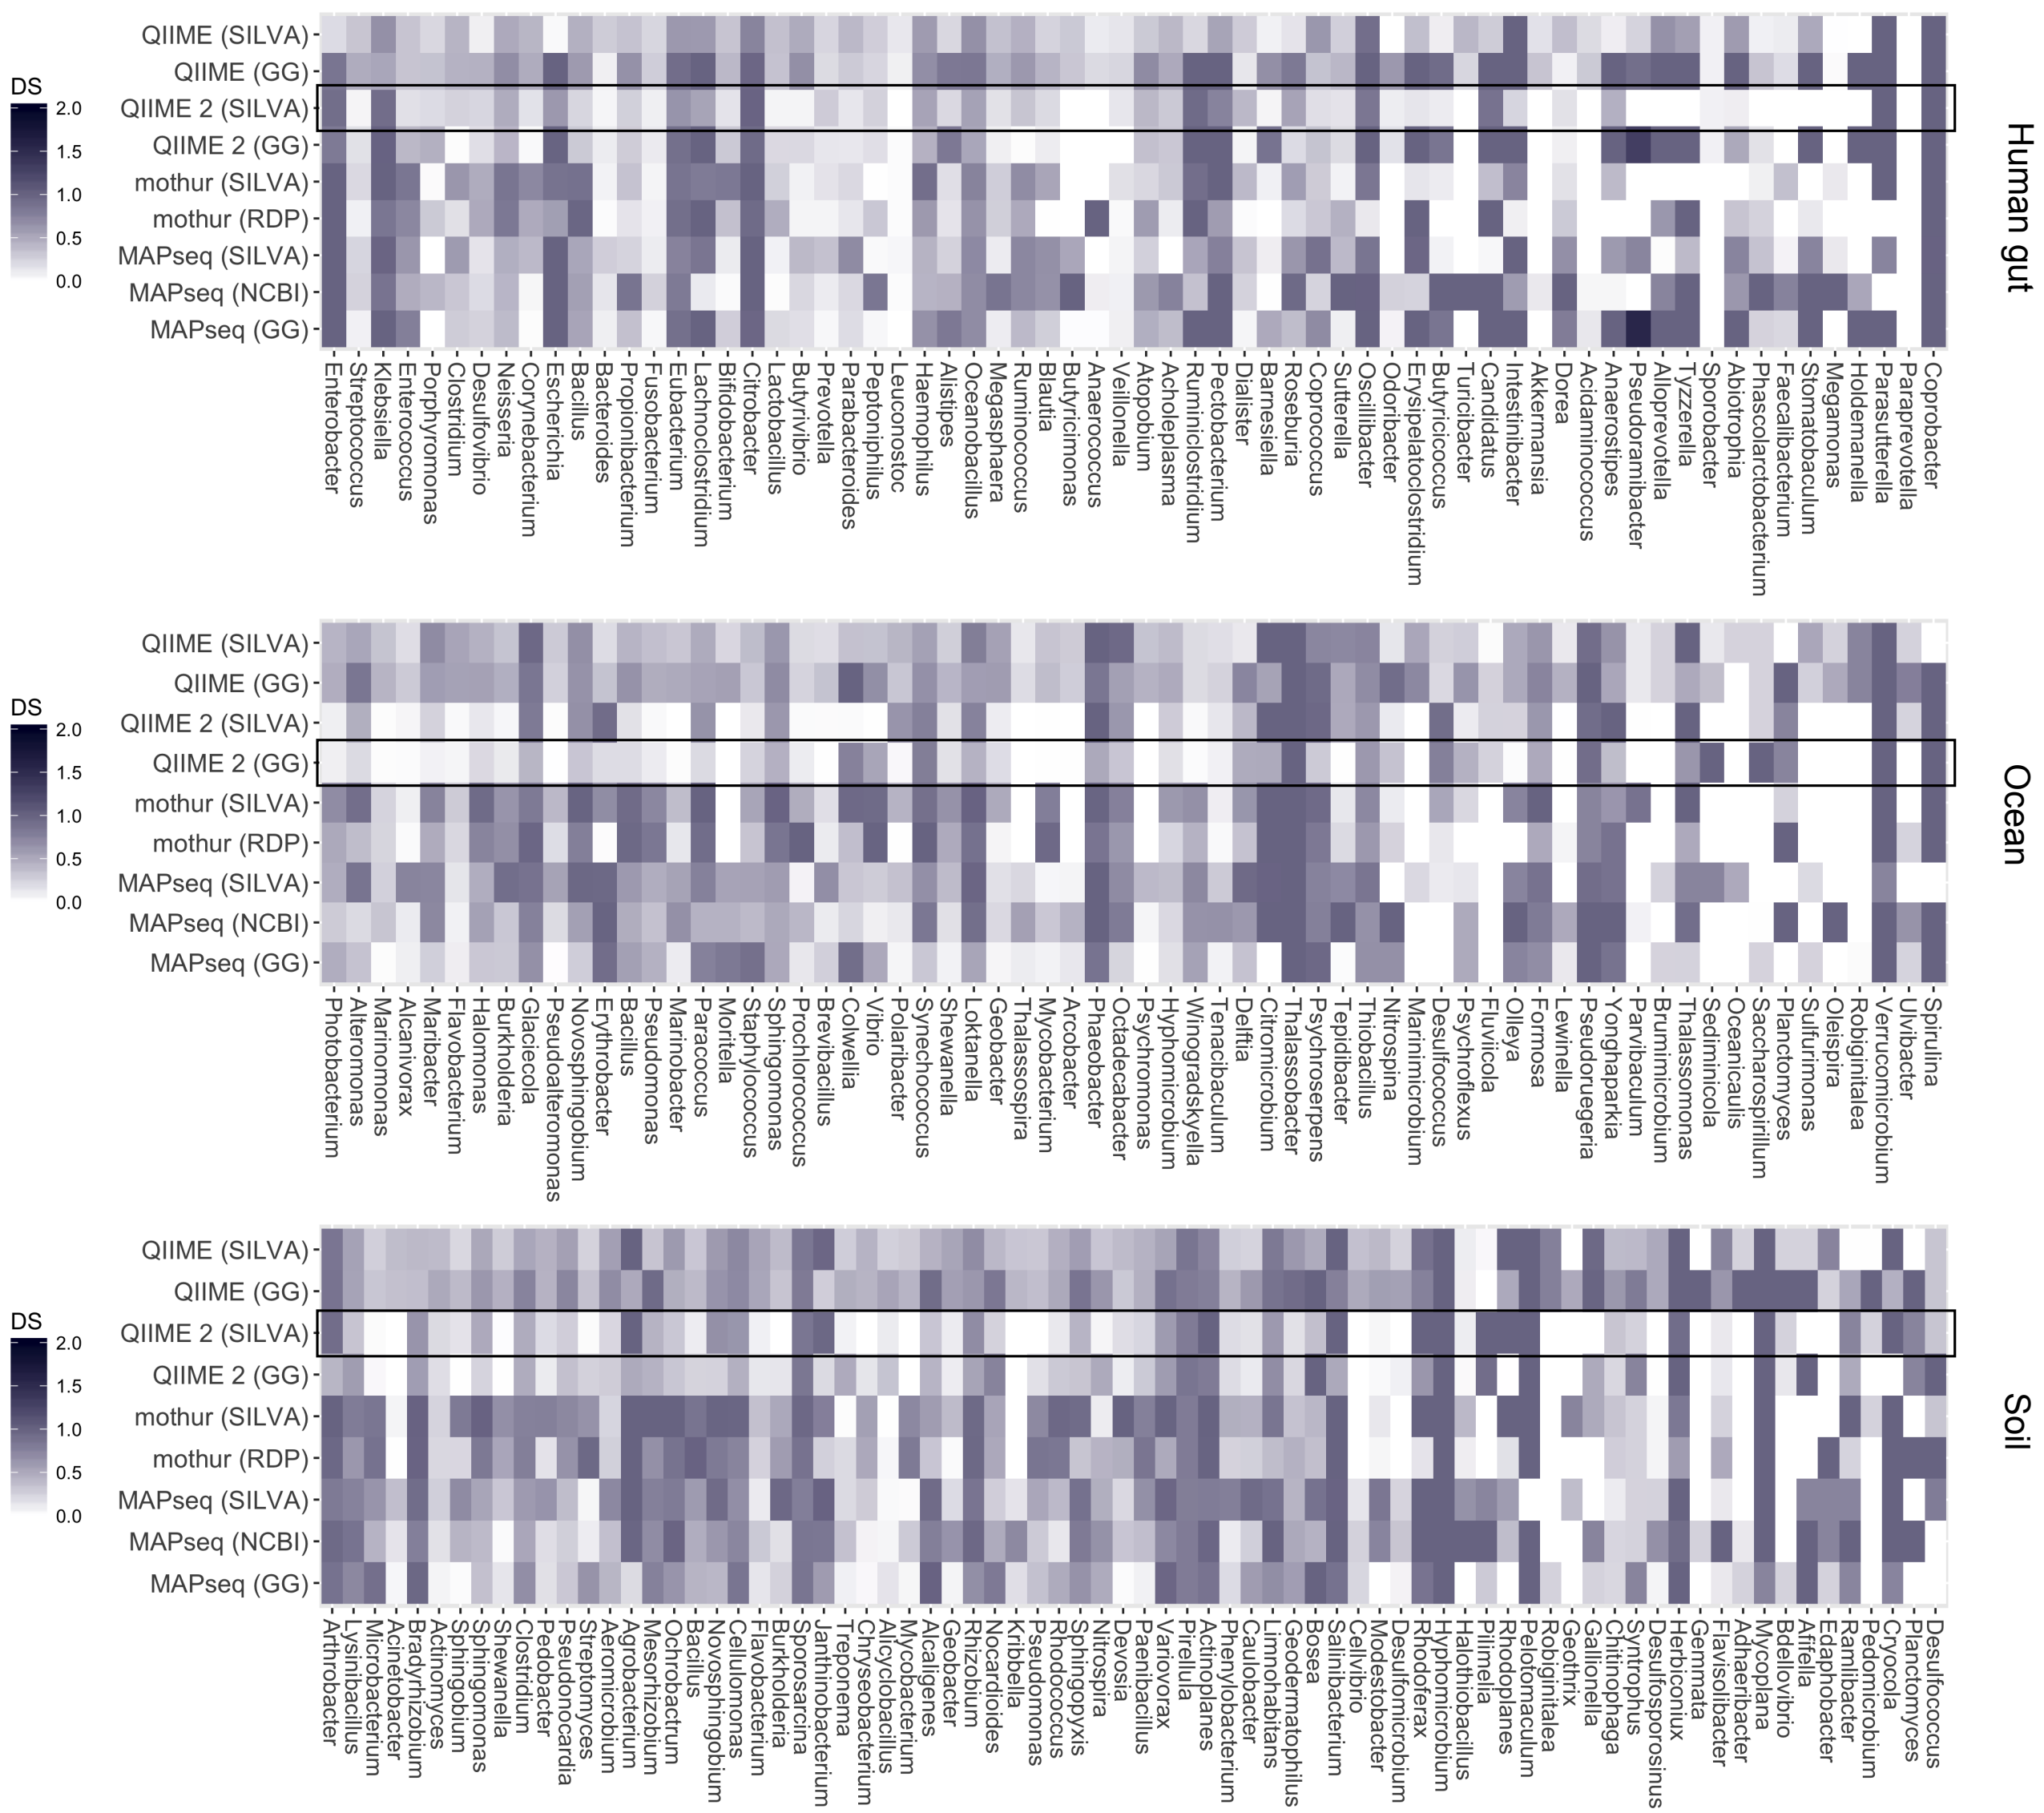

Figure 5

[Click here to download Figure Figure\\_5.pdf](#)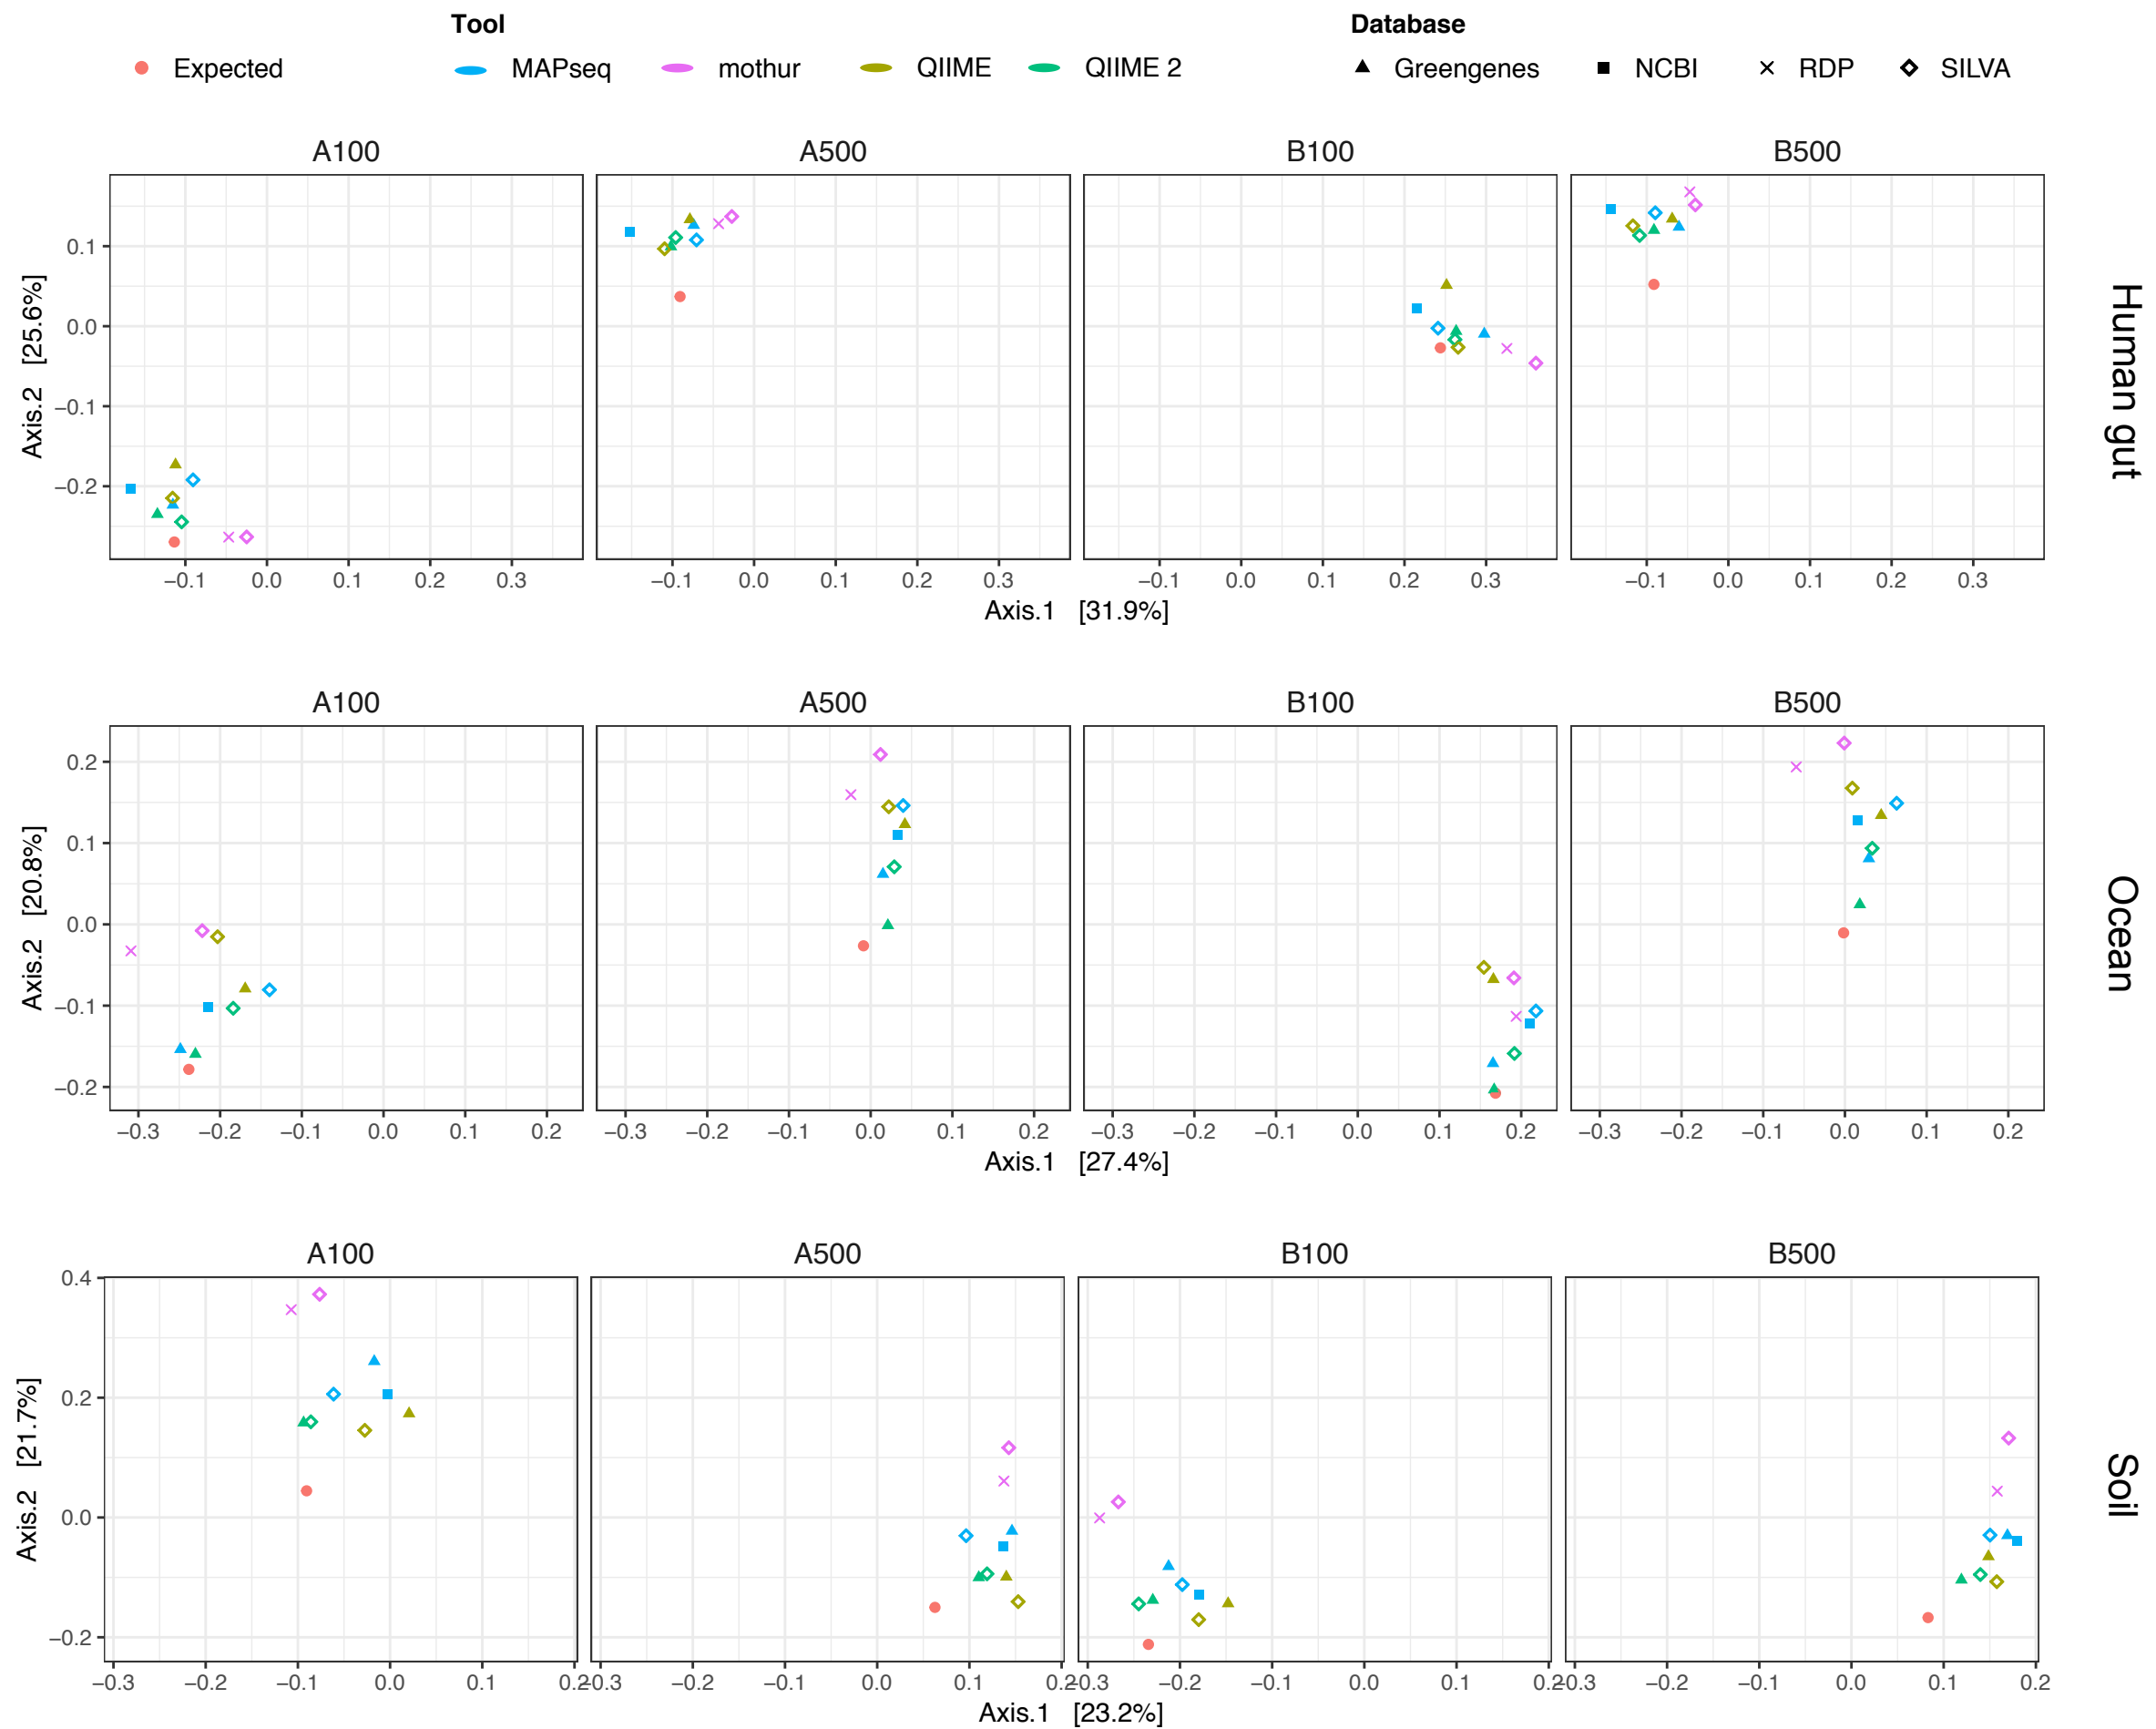



Click here to access/download  
**Supplementary Material**  
Table\_S1.xlsx



Click here to access/download  
**Supplementary Material**  
Table\_S2.xlsx

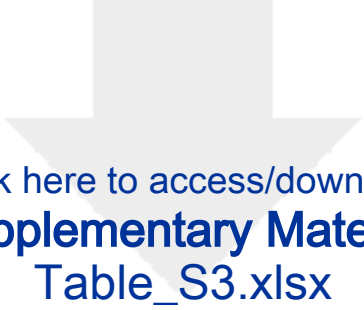

Click here to access/download  
**Supplementary Material**  
Table\_S3.xlsx





Click here to access/download  
**Supplementary Material**  
Table\_S4.xlsx



Click here to access/download  
**Supplementary Material**  
Table\_S5.xlsx

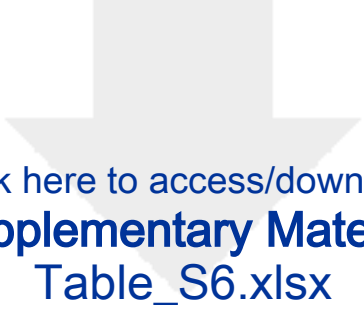

Click here to access/download  
**Supplementary Material**  
Table\_S6.xlsx





Click here to access/download  
**Supplementary Material**  
Table\_S7.xlsx



Click here to access/download  
**Supplementary Material**  
Figure\_S1.pdf



Click here to access/download  
**Supplementary Material**  
Figure\_S2.pdf



Click here to access/download  
**Supplementary Material**  
Figure\_S3.pdf





Click here to access/download  
**Supplementary Material**  
Figure\_S4.pdf







Click here to access/download  
**Supplementary Material**  
Figure\_S5.pdf
